1 **Cbs** **overdosage** **is** **necessary** **and** **sufficient** **to** **induce**  
2 **cognitive** **phenotypes** **in** **mouse** **models** **of** **Down** **syndrome**  
3 **and** **interacts** **genetically** **with** *Dyrk1a*

4

5 **AUTHORS**

6 Damien Marechal<sup>1,2,3,4</sup>, Véronique Brault<sup>1,2,3,4</sup>, Alice Leon<sup>5</sup>, Dehren Martin<sup>1,2,3,4</sup>, Patricia  
7 Lopes Pereira<sup>6</sup>, Nadege Loaëc<sup>5</sup>, Marie-Christine Birling<sup>7</sup>, Gaele Friocourt<sup>5,#</sup>, Marc  
8 Blondel<sup>5,#</sup> and Yann Herault<sup>1,2,3,4,7,\*</sup>

9 **Affiliations**

10 <sup>1</sup> Institut de Génétique et de Biologie Moléculaire et Cellulaire, Illkirch, 1 rue Laurent  
11 Fries, 67404 Illkirch, France

12 <sup>2</sup> Centre National de la Recherche Scientifique, UMR7104, Illkirch, France

13 <sup>3</sup> Institut National de la Santé et de la Recherche Médicale, U1258, Illkirch, France

14 <sup>4</sup> Université de Strasbourg, Illkirch, France.

15 <sup>5</sup> Inserm UMR 1078, Université de Bretagne Occidentale, Faculté de Médecine et des  
16 Sciences de la Santé, Etablissement Français du Sang (EFS) Bretagne, CHRU Brest,  
17 Hôpital Morvan, Laboratoire de Génétique Moléculaire, Brest, France.

18 <sup>6</sup> Transgenese et Archivage Animaux Modèles, TAAM, CNRS, UPS44, 3B rue de la  
19 Férollerie 45071 Orléans, France

20 <sup>7</sup> CELPHEDIA, PHENOMIN, Institut Clinique de la Souris, ICS, 1 rue Laurent Fries,  
21 67404 Illkirch, France

22 # Both authors contributed equally.

23 \* Corresponding author: Yann Hérault

24

25

## 26 **ABSTRACT**

27 Identifying dosage sensitive genes is a key to understand the mechanisms  
28 underlying intellectual disability in Down syndrome (DS). The Dp(17Abcg1-Cbs)1Yah  
29 DS mouse model (Dp1Yah) show cognitive phenotype and needs to be investigated  
30 to identify the main genetic driver. Here, we report that, in the Dp1Yah mice, 3 copies  
31 of the Cystathionine-beta-synthase gene (*Cbs*) are necessary to observe a deficit in  
32 the novel object recognition (NOR) paradigm. Moreover, the overexpression of *Cbs*  
33 alone is sufficient to induce NOR deficit. Accordingly targeting the overexpression of  
34 human CBS, specifically in Camk2a-expressing neurons, leads to impaired objects  
35 discrimination. Altogether this shows that *Cbs* overdosage is involved in DS learning  
36 and memory phenotypes. In order to go further, we identified compounds that interfere  
37 with the phenotypical consequence of CBS overdosage in yeast. Pharmacological  
38 intervention in the Tg(*CBS*) with one selected compound restored memory in the novel  
39 object recognition. In addition, using a genetic approach, we demonstrated an epistatic  
40 interaction between *Cbs* and *Dyrk1a*, another human chromosome 21 gene encoding  
41 the dual-specificity tyrosine phosphorylation-regulated kinase 1a and an already

42 known target for DS therapeutic intervention. Further analysis using proteomic  
43 approaches highlighted several pathways, including synaptic transmission, cell  
44 projection morphogenesis, and actin cytoskeleton, that are affected by DYRK1A and  
45 CBS overexpression. Overall we demonstrated that CBS overexpression underpins the  
46 DS-related recognition memory deficit and that both *CBS* and *DYRK1A* interact to  
47 control accurate memory processes in DS. In addition, our study establishes CBS as  
48 an intervention point for treating intellectual deficiencies linked to DS.

49

## 50 **SIGNIFICANT STATEMENT**

51 Here, we investigated a region homologous to Hsa21 and located on mouse  
52 chromosome 17. We demonstrated using three independent genetic approaches that  
53 the overexpression of the Cystathionine-beta-synthase gene (*Cbs*) gene, encoded in the  
54 segment, is necessary and sufficient to induce deficit in novel object recognition (NR).

55 In addition, we identified compounds that interfere with the phenotypical  
56 consequence of CBS overexpression in yeast and in mouse transgenic lines. Then we  
57 analyzed the relation between *Cbs* overexpression and the consequence of DYRK1a  
58 overexpression, a main driver of another region homologous to Hsa21 and we  
59 demonstrated that an epistatic interaction exist between *Cbs* and *Dyrk1a* affecting  
60 different pathways, including synaptic transmission, cell projection morphogenesis,  
61 and actin cytoskeleton.

62

## 63 INTRODUCTION

64 Down Syndrome (DS) is the most common aneuploidy observed in human. The  
65 presence of an extra copy of the Human chromosome 21 (Hsa21; Hsa for *Homo*  
66 *sapiens*) is associated with intellectual disabilities and several morphological and  
67 physiological features. Phenotypic mapping in human with partial duplication  
68 highlighted the contribution of several regions of the Hsa21 in DS features (1, 2).  
69 Additional information was collected from trisomic and monosomic mouse models to  
70 detect genomic regions sensitive to dosage and able to induce impairments in  
71 behaviour and other DS related traits (3-11). Most of the efforts focused on the region  
72 homologous to the Hsa21 located on mouse chromosome 16 (Mmu16; *Mmu* for *Mus*  
73 *Musculus*), highlighting the contribution of the Amyloid precursor protein (*App*) (12), of  
74 the Glutamate receptor, ionotropic, kainate 1 (*Grik1*) or of the dual-specificity tyrosine  
75 phosphorylation-regulated kinase 1a (*Dyrk1a*) (13, 14) overdosage to DS cognitive  
76 defects. At present, DYRK1A is a main target for therapeutic intervention with a few  
77 compounds inhibiting the protein kinase activity, improving mainly cognition in DS  
78 mouse models (15-20). However, models carrying trisomy of the region of Mmu17  
79 homologous with the Hsa21, also showed learning and memory defects (21, 22) and  
80 appeared to have a major impact on DS phenotypes in mouse models (23). The  
81 Dp(17*Abcg1-Cbs*)1Yah (called here Dp1Yah) mice are defective in the novel object  
82 recognition test and show a long-lasting in vivo long-term potentiation (LTP) in the  
83 hippocampus while the corresponding monosomy, Ms2Yah, have defects in social  
84 discrimination with increased in vivo LTP (24). Interestingly, as observed in the rotarod  
85 test, the locomotor phenotype of the Tc1 transchromosomic model carrying an almost  
86 complete Hsa21 is rescued when the dosage of the *Abcg1-Cbs* region is reduced in

87 Tc1/Ms2Yah mice (25). Similarly the trisomy of a larger overlapping segment on  
88 Mmu17 from *Abcg1* to *Rrp1b* induces an increased LTP as compared to control in the  
89 Dp(17)Yey model (22) and was shown to genetically interact with the trisomy of the  
90 *Lipi-Zbtb21* interval. More specifically the trisomy of both this *Abcg1-Rrp1b* region and  
91 the *Cbr1-Fam3b* region was detrimental for learning and memory in the Morris water  
92 maze and for LTP in DS mouse models (23).

93         Among the 11 trisomic genes in the Dp1Yah model, the cystathionine-beta-  
94 synthase gene, *Cbs*, encodes a pyridoxal phosphate-dependent enzyme converting  
95 homocysteine to cystathionine. This first step of the transulfuration pathway removes  
96 homocysteine from the methionine cycle thereby also affecting the folate and the  
97 methylation pathways, while contributing to the cysteine cycle. Of note, in human,  
98 homozygous loss-of-function mutations in *CBS* are associated with homocystinuria  
99 (OMIN236200) a metabolic condition with intellectual disability. CBS is also the major  
100 enzyme catalysing the production of H<sub>2</sub>S from L-cysteine (26) or from the condensation  
101 of homocysteine with cysteine (27). H<sub>2</sub>S is now considered a major gaseotransmitter  
102 in the brain (28) and interferes with synaptic transmission. Considering the upregulated  
103 expression of CBS in several brain regions of the Dp1Yah model and its impact on  
104 intellectual disability, we decided to focus on *Cbs* and decipher the role of CBS in DS  
105 cognitive phenotypes. To this end, we generated and characterized constitutive and  
106 conditional changes in *Cbs* dosage in the nervous system of various mouse models.  
107 In addition we selected pharmacological drugs able to counteract the phenotypical  
108 consequence of CBS overexpression, in particular behavioural impairments, and finally  
109 further analysed molecular changes induced by *Cbs* dosage changes to understand  
110 the mechanisms perturbed in DS models.



## 112 MATERIALS AND METHODS

### 113 Ethics Statement, mouse lines and genotyping

114 Animal experiments were approved by the Com'Eth N°17 (project file: 2012-  
115 069) and accredited by the French Ministry for Superior Education and Research and  
116 in accordance with the Directive of the European Parliament: 2010/63/EU,  
117 revising/replacing Directive 86/609/EEC and with French Law (Decret n° 2013-118 01  
118 and its supporting annexes entered into legislation 01 February 2013) relative to the  
119 protection of animals used in scientific experimentation. YH was granted the  
120 accreditation 67-369 to perform the reported experiments in the animal facility  
121 (Agreement C67-218-40). For all these tests, mice were kept in Specific Pathogen free  
122 conditions with free access to food and water. The light cycle was controlled as 12 h  
123 light and 12 h dark (lights on at 7AM). All the behavioural tests were done between  
124 9:00 AM and 4:00 PM.

125 Several mouse lines were used to decipher the influence of *Cbs*: the trisomic  
126 mouse model, Dp(17Abcg1-Cbs)1Yah, named here Dp1Yah, carries a segmental  
127 duplication of the *Abcg1-Cbs* region of the Mmu17 (21) kept on the C57BL/6J; the  
128 inactivated allele of C57BL/6J.*Cbs*<sup>tm1Unc</sup> (29); and the PAC transgenic line  
129 Tg(*CBS*)11181Eri (named here Tg(*CBS*)), originally identified as 60.4P102D1 (30) and  
130 backcrossed on C57BL/6J for more than 7 generations. We designed, generated and  
131 selected the transgenic mouse line Tg(*Prp-gfp-CBS*)95-157ICS, named here Tg(*Prp-*  
132 *gfp-CBS*), to overexpress the human *CBS* cDNA from the murine prion promoter region  
133 (containing a 8477 bp region upstream of the ATG of the murine prion gene, ie 6170  
134 bp promoter region, exon1, intron 1 and beginning of exon 2) after the excision of a

135 loxP-*gfp-loxP* interrupting cassette (Figure 3A) on C57BL/6J background. We used the  
136 transgenic Tg(Camk2a-cre)4Gsc mouse line (31), named here Tg(*Camk2a-cre*), and  
137 bred further on C57BL/6J, as a glutamatergic neuron-specific Cre driver. The *Dyrk1a*  
138 BAC transgenic mouse line, named here Tg(*Dyrk1a*) was generated previously in our  
139 lab (32). All lines were generated and bred on the C57BL/6J genetic. The genotype  
140 identification was done from genomic DNA isolated from tail biopsies with specific PCR  
141 reaction (Supplementary table 1).

## 142 Behavioural analysis

143 The sample size was estimated according to our similar experiments done  
144 previously while investigating behaviour in DS mouse models (5, 25, 33). To  
145 investigate the role of *Cbs* in the Dp1Yah cognitive phenotypes, we generated 2  
146 independent cohorts (cohort 1 (C1): wild type (wt) littermates n=11; *Cbs*<sup>tm1Unc/+</sup>, n=8;  
147 Dp1Yah, n=8; Dp1Yah/*Cbs*<sup>tm1Unc</sup>, n=11; and cohort 2 (C2): wt littermates n=18;  
148 *Cbs*<sup>tm1Unc/+</sup>, n=15; Dp1Yah, n=15; Dp1Yah/*Cbs*<sup>tm1Unc</sup>, n=10). All cohorts were evaluated  
149 in the open field (C1: 33 weeks; C2: 14-16 weeks), Novel Object Recognition (NOR)  
150 (C1: 33 weeks; C2:14-16 weeks) in adult mice. In addition we performed the Y maze  
151 (C2: 15-19 weeks) and the rotarod tests (C2: 25-28 weeks of age).

152 Wild-type littermates (n=13) and Tg(CBS)/0 (n=17) hemizygotes were tested for  
153 circadian actimetry (14 weeks), Y Maze (16 weeks), open field (17 weeks) and NOR  
154 (17 weeks). We added an additional group of wt (n=9) and Tg(CBS)/0 (n=10) to  
155 validate the results from the NOR; animals were tested at the same age (17 weeks). A  
156 cohort with 4 genotypes (wt (n=13), Tg(Camk2-Cre)/0 (n=11), Tg(*Prp-gfp-CBS*)/0  
157 (n=12), and Tg(Camk2-Cre)/0;Tg(*Prp-gfp-CBS*)/0 (n=14)) was evaluated through the



158 same behavioural tests with rotarod (14 weeks), Y maze (16 weeks), open field (19-20  
159 weeks) and NOR (19-20 weeks). 14 wt, 15 Tg(*Dyrk1a*), 13 Dp1Yah and 13  
160 Dp1Yah/Tg(*Dyrk1a*) mutant mice were evaluated for open field exploration (11-12  
161 weeks), novel object recognition (11-12 weeks) and Y maze (13 weeks). A second  
162 independent cohort with 11 wt, 10 Tg(*Dyrk1a*), 14 Dp1Yah and 10 Dp1Yah/Tg(*Dyrk1a*)  
163 was used for Morris water maze learning (14-16 weeks). The behavioural protocols for  
164 open-field, Y maze and novel object recognition, rotarod, water maze were are detailed  
165 in the supplementary information.

## 166 **Drug screening in yeast**

167 All plasmids were generated using standard procedures. Restriction enzymes  
168 and Taq polymerase were obtained from New England Biolabs (Evry, France). T4 DNA  
169 ligase was purchased from Promega and purified synthetic oligonucleotides from  
170 Eurogentec. Routine plasmid maintenance was carried out in DH5 $\alpha$  and TOP10  
171 bacteria strains. Yeast cystathionine b-synthase (*Cys4*) coding sequence was  
172 amplified from the genomic DNA of the W303 *WT* strain (see genotype below) using  
173 Bam-Cys4-F: CGGGATCCCGATGACTAAATCTGAGCAGCAAG and Xho-Cys4-R:  
174 GCCTCGAGTCTTATGCTAAGTAGCTCAGTAAATCC (that introduced *Bam*HI and  
175 *Xho*1 restriction sites) and subcloned in the high copy number 2  $\mu$ -derived vectors  
176 p424-GPD and p426-GPD, each time under the control of the strong constitutive *GDP*  
177 promoter (34). Transformation of yeast cells was performed using a standard lithium  
178 acetate method (35).

179 The yeast strain used in this study is derived from the W303 *WT* strain: *MATa*,  
180 *leu2-3,112 trp1-1 can1-100 ura3-1 ade2-1 his3-11,15*. The media used for yeast

181 growth were: YPD [1% (w/v) yeast extract, 2% (w/v) peptone, 2% (w/v) glucose, for  
182 untransformed cells and Synthetic Dextrose *Minimal medium* (SD medium) (composed  
183 of 0.67% (w/v) Yeast Nitrogen Base w/o amino acids and complemented with 0.1%  
184 (w/v) casamino acid, 40 mg/l adenine and 2% (v/v) glucose for Cys4-transformed cells.  
185 Solid media contained 2% (w/v) agar.

186 For the drug screening, yeast cells were grown in uracil- and tryptophan-free  
187 minimal liquid medium (SD-Ura/Trp) in overnight liquid cultures at 29 °C. The following  
188 day, cells were diluted to OD<sub>600</sub>~0.2 in fresh medium and grown for 4 hours to reach  
189 exponential phase. Then three hundred and fifty microliters of exponentially growing  
190 yeast cells overexpressing Cys4, adjusted to an OD<sub>600</sub> of 0.5, were spread  
191 homogeneously with sterile glass beads (a mix of ~1.5 and 3 mm diameter) on a square  
192 Petri dish (12 cm × 12cm) containing uracil-, tryptophan- and methionine-free minimal  
193 agar-based solid medium (SD-Ura/Trp/Met) containing 2% (w/v) serine. Sterile filters  
194 (Thermo Fisher similar to those used for antibiograms) were placed on the agar  
195 surface, and 2 µl of individual compound from the various chemical libraries were  
196 applied to each filter. In addition, for each Petri plate, DMSO, the vehicle, was added  
197 as a negative control on the top left filter, and 2 nmol of methionine as a positive control  
198 on the bottom right filter. Plates were then incubated at 33 °C for 3 days and scanned  
199 using a Snap Scan1212 (Agfa).

200 Two repurposed drug libraries were screened: the Prestwick Chemical Library®  
201 (1200 drugs) and the BIOMOL's FDA Approved Drug Library (Enzo Life Sciences, 640  
202 drugs). In addition, the Prestwick Phytochemical library (691 green compounds, most  
203 of them being in use in Human) was also screened. The compounds were supplied in  
204 96-well plates as 10 mM (for the two Prestwick® libraries) and 2 mg/ml (BIOLMOL®)

205 DMSO solutions. Disulfiram was purchased from Sigma-Aldrich and resuspended in  
206 DMSO.

207

## 208 **Mouse model treatment with Disulfiram (DSF)**

209 A pre-clinical protocol was designed to target cognitive defects correlated to  
210 CBS overexpression in Tg(*CBS*) mice brain (figure 4D). The selected molecule was  
211 Disulfiram (DSF), a potent inhibitor of mitochondrial aldehyde dehydrogenase (ALDH)  
212 used for the treatment of chronic alcoholism. We based our experiment on the work of  
213 Kim et al. (36) in which the DSF effect on ethanol sensitization in mice was  
214 demonstrated.

215 Behavioural studies were conducted in 12-16 week old animals; to do so, we  
216 generated 3 independent cohorts, in which we tested 4 conditions taking into account  
217 the dose of DSF (or vehicle alone) and the genotype. For the cohorts (C1 to C3), we  
218 produced respectively 5,7,3 (n=15 in total) wild type (wt) treated with vehicle, 5,3,6  
219 (n=14 in total) transgenic for human *CBS* (Tg(*CBS*)) treated with vehicle, 7,5,3 (n=15  
220 in total) wt treated with 10mg/kg/day of DSF, 6,6,8 (n=20 in total) Tg(*CBS*) treated with  
221 10mg/kg/day of DSF based on the dose previously administrated in the reference  
222 publication (36). The local ethics committee, Com'Eth (n°17), approved the mouse  
223 experimental procedures, under the accreditation number APAFIS#1564-  
224 2015083114276031 with YH as the principal investigator in this study. All assessments  
225 were scored blind to genotype and animals were randomly distributed to experimental  
226 groups and treatment as recommended by the ARRIVE guidelines (37, 38). DSF was  
227 prepared at 10 mg/mL in DMSO, aliquoted and stored below -20°C. The final

228 formulation was prepared just prior to use as a 1 mg/mL solution diluted in Cremophor  
229 EL Castor oil (BASF)/H<sub>2</sub>O ready for injection (15/75), to reach a final  
230 DMSO/Cremophor/H<sub>2</sub>O 10/15/75 (v/v/v) mix. Treated animals received a daily dose  
231 (10 days) of this formulation by intra-peritoneal injection of 10 mg/kg/day. Non-treated  
232 animals received the same formulation without DSF. On day 10 of treatment, the  
233 animal were habituated 30 min into the arena. On day 11, animals were tested in NOR  
234 paradigm to assess recognition memory after 1 hour retention as described in the Open  
235 field and Object recognition task protocols (Supplementary information).

### 236 **Quantitative proteomic analysis**

237 We collected 5 hippocampi of littermates with the 4 genotypes: wt, Dp1Yah,  
238 Tg(*Dyrk1a*)/0 and [Dp1Yah,Tg(*Dyrk1a*)/0] after the behavioural evaluation at the age  
239 of 25-27 weeks. Samples were reduced, alkylated and digested with LysC and trypsin  
240 at 37°C overnight. Five sets of samples with one sample from each genotypes (4 in  
241 total) were labelled with Thermo Scientific Tandem Mass isobaric tag (TMT), pooled  
242 and then analysed using an Ultimate 3000 nano-RSLC (Thermo Scientific, San Jose  
243 California) coupled in line with an Orbitrap ELITE (Thermo Scientific, San Jose  
244 California). An additional set was done comparing all the wt controls together. Briefly,  
245 peptides were separated on a C18 nano-column with a linear gradient of acetonitrile  
246 and analysed in a Top 15 HCD (Higher collision dissociation) data-dependent mass  
247 spectrometry. Data were processed by database searching using SequestHT (Thermo  
248 Fisher Scientific) with Proteome Discoverer 1.4 software (Thermo Fisher Scientific)  
249 against a mouse Swissprot database. Precursor and fragment mass tolerance were  
250 set at 7 ppm and 20 ppm respectively. Trypsin was set as enzyme, and up to 2 missed  
251 cleavages were allowed. Oxidation (M) and TMT labelled peptides in primary amino

252 groups (+229.163 Da K and N-ter) were set as variable modification, and  
253 Carbamidomethylation (C) as fixed modification. We then compared our 5 wt samples  
254 to determine the sample closer to average score from the group, and defined it as the  
255 reference sample. All the protein quantification was done based on the reference wt  
256 sample. In total, we detected 1655 proteins filtered with false discovery rate (FDR) at  
257 5% with a minimum of 2 peptides for a given protein detected per genotypes. We  
258 calculated the mean of the fold change for each proteins from all the samples (Dp1Yah,  
259 Tg(*Dyrk1a*) and Dp1Yah/Tg(*Dyrk1a*) compared to control. From the preliminary data,  
260 we selected 208 proteins with variability level below 40% and a fold change below 0.8  
261 or above 1.2.

## 262 **Western Blot analysis**

263 Ten microgram of total proteins from cortex extracts were electrophoretically  
264 separated in SDS–polyacrylamide gels (10%) and then transferred to nitrocellulose  
265 membrane (120V) during 1h30. Non-specific binding sites were blocked with 5% skim  
266 milk powder in Tween Tris buffer saline (T.T.B.S.) 1 h at room temperature.  
267 Immunoblotting was carried out with primary antibody (Supplementary table 2)  
268 incubated overnight at 4°C. The next day, we started with 3 washing baths with  
269 T.T.B.S, followed by secondary conjugated with horseradish peroxidase. The  
270 immunoreactions were visualized by ECL chemiluminescence system (Clarity™  
271 western ECL substrate – Bio-Rad); Epifluorescence was captured with Amersham™  
272 Imager 600. Bands were detected at 18, 25 and 75 kDa respectively for SNCA,  
273 SNAP25 and FUS; Signals were quantified with ImageJ.

## 274 RESULTS

### 275 Three copies of *Cbs* are necessary to induce cognitive impairments in the 276 Dp1Yah mice.

277 In order to challenge the hypothesis that three copies of *Cbs* are necessary to  
278 induce behavioural deficits in the Dp1Yah mice, we combined the Dp1Yah mice with  
279 the *Cbs*<sup>tm1Unc/+</sup> knock-out model (29) and we compared the Dp1Yah with  
280 Dp1Yah/*Cbs*<sup>tm1Unc</sup> (in which only two copy of *Cbs* are functional), wild type (wt) and  
281 *Cbs*<sup>tm1Unc/+</sup> heterozygote controls. In the open field test, most of the genotypes  
282 displayed similar exploratory behaviour, except for the Dp1Yah/*Cbs* mice that travelled  
283 more distance in the open field arena with a higher speed (Figure 1A left panel; On  
284 way ANOVA on distance, post hoc Tukey Test: Dp1Yah vs Dp1Yah/*Cbs*<sup>+tm1Unc</sup>  
285 p=0.002; Figure 1A right panel; On way ANOVA on speed, post hoc Tukey Test: wt vs  
286 Dp1Yah/*Cbs*<sup>+tm1Unc</sup> p=0.004; *Cbs*<sup>+tm1Unc</sup> vs Dp1Yah/*Cbs*<sup>+tm1Unc</sup> p=0.05; Dp1Yah vs  
287 Dp1Yah/*Cbs*<sup>+tm1Unc</sup> p=0.007). Similarly when the mice performed the Y maze, we  
288 confirmed the increased activity with a higher number of arm entries for the  
289 Dp1Yah/*Cbs*<sup>tm1Unc</sup> compared to the other genotypes (Figure 1B; Kruskal-Wallis One  
290 way ANOVA on Ranks – genotypes, post hoc Dunn's method: wt vs  
291 Dp1Yah/*Cbs*<sup>+tm1Unc</sup> p<0.05; Dp1Yah vs Dp1Yah/*Cbs*<sup>+tm1Unc</sup> p<0.05) but no impact on  
292 spontaneous alternation (One way ANOVA, F(3,87)=2.486 p=0.066). To determine if  
293 motor activity was altered in the Dp1Yah/*Cbs*<sup>tm1Unc</sup> model, we used the rotarod test.  
294 After the first day of training we did not find any change in the maximum speed reached  
295 before falling for all tested genotypes (Figure 1C; Speed: repeated measures ANOVA  
296 variable « genotype » and « day », F(3;110)=1.816 p=0.155). Nevertheless, we  
297 observed a decrease in the locomotor learning in the Dp1Yah mice comparing to the

298 next following days of training which was rescued in the Dp1Yah/*Cbs*<sup>tm1Unc</sup> mutant  
299 (Figure 1C; Speed : repeated measures 2 way ANOVA variable « genotype » and  
300 « day »,  $F(2;165)=17.171$   $p<0.001$  post hoc Tuckey method wt «day1 vs day3»  
301  $p=0.002$ ; *Cbs*<sup>tm1Unc/+</sup> «day1 vs day3»  $p<0,001$ ; Dp1Yah «day1 vs day3»  $p=0.238$ ;  
302 Dp1Yah/*Cbs*<sup>tm1Unc</sup> «day1 vs day3»  $p=0.017$ ). During the test phase, we found that the  
303 Dp1Yah individuals showed a weaker performance compared to *Cbs*<sup>tm1Unc/+</sup> and  
304 Dp1Yah/*Cbs*<sup>tm1Unc</sup> (ANOVA, variable « speed » and « genotype »  $F(3;385)=5.544$   
305  $p<0.001$  post hoc Tuckey method; «wt vs Dp1Yah»  $p=0.099$ ; «*Cbs*<sup>tm1Unc/+</sup> vs Dp1Yah»  
306  $p=0.001$ ; «Dp1Yah vs Dp1Yah/*Cbs*<sup>tm1Unc</sup>»  $p=0.01$ ).

307 Then we tested the object memory. No difference was observed during the  
308 exploration of the familiar object in the presentation phase of the test (Figure 1D top  
309 left panel). However, during the discrimination phase, after 1h of retention, the Dp1Yah  
310 mutant mice were not able to differentiate the familiar versus the novel object whereas  
311 the wt, *Cbs*<sup>tm1Unc/+</sup> and the Dp1Yah/*Cbs*<sup>tm1Unc</sup> spent significantly more time on the new  
312 object compared to the familiar one (Figure 1D, left bottom panel; two ways ANOVA,  
313 variables “genotype” and “objects”:  $F(3;56)= 2.86$  with  $p=0.045$ ; post hoc Tuckey  
314 method wt “fam vs new”  $q= 4.885$  and  $p= 0.001$ ; *Cbs*<sup>tm1Unc/+</sup>  $q= 3.913$  and  $p= 0.008$ ;  
315 Dp1Yah,  $q= 0,503$  and  $p= 0.724$ ; Dp1Yah/*Cbs*<sup>tm1Unc/+</sup>  $q= 4.715$  and  $p= 0.002$ ).  
316 Accordingly, the recognition index showed that the restoration of two functional copies  
317 of *Cbs* in the Dp1Yah mice rescued memory performance in object recognition (Figure  
318 1D right panel; One sample t-test: wt  $p=0.05$ ; *Cbs*<sup>tm1Unc/+</sup>  $p= 0.01$ ; Dp1Yah  $p=0.82$ ;  
319 Dp1Yah/*Cbs*<sup>tm1Unc/+</sup>  $p=0.05$ ).

320 Overall this set of experiments demonstrated that 3 copies of *Cbs* were  
321 necessary for inducing the Dp1Yah phenotypes in novel object recognition. In addition

322 rescuing *Cbs* dosage induced a slight hyperactive phenotype during the exploration of  
323 a new environment and restored performance in the rotarod activity. Interestingly,  
324 returning back to wt level of expression of *Cbs* in the *Abcg1-Cbs* region enables  
325 another trisomic gene from this region to impact on the exploratory behaviour of the  
326 mouse

327 **The sole overexpression of a human CBS transgene impacts the object**  
328 **recognition and the locomotor activity.**

329 We used the Tg(*CBS*), a PAC transgenic line encompassing a 60kb fragment  
330 with the human *CBS* locus (30) to analyse the impact of the sole increase of *Cbs*  
331 dosage on behaviour and cognition. As shown in figure 2A, no difference in locomotor  
332 activity was observed during the exploration of a new environment in the open field  
333 test between wt and transgenic littermates (Student t-test distance: wt vs Tg(*CBS*)/0  
334  $p=0.925$ ; speed wt vs Tg(*CBS*)/0  $p=0.925$ ). However we found higher circadian activity  
335 for isolated individuals (Figure 2C; student t-test wt vs Tg(*CBS*)  $p<0.001$ ) which results  
336 from an increased locomotor activity during the habituation and the dark phase (Figure  
337 2B). In the Y maze (Figures 2D-E), no difference was detected for the number of arm  
338 entries and the spontaneous alternation. In the novel object recognition test, (Figures  
339 2F-H) the Tg(*CBS*)/0 animals spent more time sniffing the two identical objects during  
340 the presentation phase than their control littermates (Figure 2F; Student t-test wt vs  
341 Tg(*CBS*)/0  $p=0.05$ ) but were impaired in object recognition as shown by the absence  
342 of discrimination between novel and familiar objects for the transgenic mice (Figure  
343 2G: Student paired t-test wt “Fo vs No”  $p= 0.008$ ; Tg(*CBS*) “Fo vs No”  $p=0.174$ )  
344 resulting in a recognition index (time on the new object / total time) not significantly  
345 different from the 50% chance level, (Figure 2H: one sample t test, significant



346 difference from 50%, wt  $p= 0.008$ ; Tg(*CBS*)/0  $p= 0.174$ ). Consequently we  
347 demonstrated that CBS overexpression is sufficient to induce deficit in novel object  
348 recognition memory and decreased locomotor activity during dark phase while having  
349 no effect during the light phase.

### 350 **Cbs overexpression in hippocampal and cortical neurons induces behavioural** 351 **defects similar to Dp1Yah**

352 We checked if we could induce the cognitive deficits observed in DS mouse  
353 models by overexpressing *Cbs* mostly in the hippocampal and cortical neurons  
354 involved in learning and memory. Hence we engineered the Tg(*Prp-gfp-CBS*) mouse  
355 strain in which the human CBS cDNA can be expressed from the Prion promoter after  
356 the excision of the *gfp* cassette flanked by loxP sites (Figure 3A) and selected one  
357 Tg(*Prp-gfp-CBS*) line with a pattern of expression in the anterior part of the adult brain  
358 (Figure 3B). We chose the Tg(*Camk2a-cre*) (31), to direct the *cre* expression in the  
359 cortical and hippocampal glutamatergic neurons and we verified the expression of the  
360 human *CBS* in different brain regions of the double transgenic (Tg(*Prp-gfp-*  
361 *CBS*)/0;Tg(*Camk2a-cre*)/0). As expected we found expression levels comparable to  
362 the endogenous murine *Cbs* gene in cerebellum while human CBS was overexpressed  
363 in the hippocampus and the cortex (Figure 3C). Littermate animals carrying wt, the two  
364 single transgenic constructs and the two transgenes were produced and tested for  
365 object recognition. During the test, the control groups, namely wt, Tg(*Prp-gfp-CBS*)/0  
366 and Tg(*Camk2a-cre*)/0, spent more time on the new object (No) than the familiar one  
367 (Fo) as expected, while the double transgenic individuals were not able to differentiate  
368 the new object from the familiar one as shown by the recognition index or the  
369 percentage of exploration time (Figure 3D; Recognition index: One sample t-test: wt

370  $p=0.03$ ; Tg(*Camk2a-cre*)/0  $p=0.03$ ; Tg(*Prp-gfp-CBS*)/0  $p=0.001$ ; (Tg(*Prp-gfp-CBS*)/0;  
371 Tg(*Camk2a-cre*)/0)  $p=0.90$ ; exploration time; two ways ANOVA, variables “genotype”  
372 and “objects”:  $F(3; 76)= 8.59$  with  $p<0.001$ ; post hoc Tuckey method wt «No vs Fo»  
373  $p<0,001$ ; Tg(*Camk2a-cre*)/0 «No vs Fo»  $p=0.001$  and Tg(*Prp-gfp-CBS*)/0 «No vs Fo»  
374  $p<0.001$ ; (Tg(*Prp-gfp-CBS*)/0; Tg(*Camk2a-cre*)/0) «No vs Fo»  $p=0,861$ ).

375         Measurements of the travelled distance in the open field and number of visited  
376 arms in the Y maze revealed hyperactivity of the Tg(*Camk2cre*)/0 carrier groups  
377 (Figures 3E-F; Openfield: One way ANOVA  $F(3,49)=4.80$   $p=0.005$ ; post hoc Holm-  
378 Sidak «wt vs Tg(*Camk2-Cre*)/0» unadjusted  $p=0.002$ ; «Tg(*Prp-gfp-CBS*)/0 vs  
379 Tg(*Camk2-Cre*)/0»  $p=0.003$ ) - Y maze: One way ANOVA  $F(3,46)=6.04$   $p=0.001$ ; post  
380 hoc Holm-Sidak «wt vs Tg(*Camk2-Cre*)/0»  $p=0.04$ ; «Tg(*Prp-gfp-CBS*)/0 vs Tg(*Camk2-*  
381 *Cre*)/0»  $p=0.009$ ; Tg(*Prp-gfp-CBS*)/0 vs Tg(*Prp-gfp-CBS*)/0;Tg(*Camk2a-*  
382 *cre*)/0 $p=0.04$ ). Like for the Dp1Yah and Tg(*CBS*) animals, we did not found any  
383 alteration in the spontaneous alternation in the Y maze test (One way ANOVA:  
384  $F(3,43)=0.691$   $p=0.563$ ). All the mice, whatever their genotype, performed equally well  
385 during the training session of the rotarod (Figure 3G) (training: repeated measures  
386 ANOVA, variables « genotype » and « day »,  $F(3;90)=2.011$   $p=0.126$ ; test: repeated  
387 measures ANOVA, variables « genotype » and « day »,  $F(2;90)=44.783$   $p<0.001$ ) as  
388 well as during the test session with increasing speed (Repeated measures ANOVA,  
389 variables « genotype » and « speed »,  $F(18;322)=0.631$   $p=0.875$ ). Thus, as expected  
390 from the role of the cerebellum in locomotor coordination, the overdose of CBS  
391 restricted to cortical and hippocampal neurons did not interfere with the locomotor  
392 activity.

393           Hence, overexpression of CBS is necessary and sufficient to induce object  
394 memory defect in a 1h retention test with limited impact on other phenotypes. As such,  
395 CBS is a new gene whose overdosage alters cognition in DS mouse models and as a  
396 consequence is likely to contribute to DS phenotypes.

397 **Identification of drugs that suppress the effects of Cys4/CBS overexpression**  
398 **both in yeast and mouse**

399           A few studies have reported the identification of CBS inhibitors (39-44) but most  
400 of them were based on *in vitro* assays using a recombinant CBS enzyme as a drug  
401 target and led to the isolation of inhibitors with relatively low potency and limited  
402 selectivity, hence leading to the idea that CBS may be an undruggable enzyme.  
403 Therefore we oriented toward an *in cellulo* phenotype-based assay that would allow  
404 screening drugs that interfere with the phenotypical consequences of CBS  
405 overexpression and thereby that do not necessarily directly target the CBS enzyme.  
406 The budding yeast *Saccharomyces cerevisiae* contains a functional homolog of CBS  
407 and has been shown to be a relevant system to model pathophysiological mechanisms  
408 involved in a number of human disorders and to perform chemobiological approaches  
409 that aim at identifying both drugs and new therapeutic targets (45-51). We thus decided  
410 to create a yeast model in which the phenotypical consequences of CBS  
411 overexpression may be easily and conveniently monitored in order to get a potential *in*  
412 *cellulo* high throughput drug screening procedure. We reasoned that if we  
413 overexpressed CBS at a sufficient level, this should lead to a decreased intracellular  
414 level of methionine, similarly to what was shown in patients, and therefore that yeast  
415 cells would become methionine auxotroph and thereby unable to grow on methionine-  
416 free minimal media. As the human CBS protein is not very stable in yeast cells and

417 therefore cannot be expressed at high levels (52), we decided to overexpress Cys4p,  
418 the CBS homolog in *S. cerevisiae*. Cys4p presents the same domains and domain  
419 organization than CBS apart from the N-terminal heme-binding domain which is absent  
420 in the yeast protein (53). To get a degree of methionine auxotrophy sufficient to allow  
421 an efficient screening, we expressed Cys4 from the strong constitutive *GPD* promoter  
422 from two different high copy number 2  $\mu$  vectors (each present at ~50 copies per cell)  
423 and supplement the growth medium with serine, which is one of the Cys4p/CBS  
424 substrates that could otherwise become limiting upon Cys4 overexpression (Figure  
425 4A).

426 Using this model, we tested  $\approx$  2200 compounds from 3 different chemical  
427 libraries consisting mainly of repurposed drugs for their ability to suppress the  
428 methionine auxotrophy induced by Cys4p overexpression. We exploited a similar  
429 principle as a yeast-based screening setup previously (46, 47, 49, 54). Briefly, we  
430 spread, on a solid agar-based methionine-free minimal medium, yeast cells  
431 overexpressing Cys4. Then we put filters on the agar surface and add different drugs  
432 from chemical libraries on each filters. After 3 days of incubation at 33°C, active  
433 compounds were identified by a halo of restored/enhanced growth around the filter on  
434 which they were loaded (Figure 4B). The advantage of this method is that, in one  
435 simple experiment, it allows numerous compounds to be tested across a large range  
436 of concentrations due to the diffusion of the molecule in the medium surrounding the  
437 filter onto which it was deposited. This design drastically improves the sensitivity of the  
438 screen because the screened compounds can be toxic at high concentrations whereas  
439 being active at subtoxic concentrations. We identified four different compounds, among  
440 which disulfiram (DSF, Figure 4C).

441           Next we tested if DSF was able to restore the object recognition of the mouse  
442 model overexpressing human *CBS*. Three independent cohorts of Tg(*CBS*) and control  
443 littermates were treated with DSF (10mg/kg/day) for 10 days before being tested for  
444 the novel object recognition. As shown in figure 4D, DSF-treated transgenic animals  
445 were restored in the novel object recognition paradigm whereas non treated mutant  
446 animals were still not able to discriminate the new versus the familiar object.  
447 Interestingly the wt treated individuals were no more able to perform the discrimination  
448 while the vehicle treated controls were able to do so (Student paired t-test: vehicle  
449 treated wt «No vs Fo» p=0,006; DSF treated wt «No vs Fo» p=0.11 and vehicle treated  
450 Tg(*CBS*) «No vs Fo» p=0.59; DSF treated Tg(*CBS*) «No vs Fo» p=0,05). This goes in  
451 line with the fact that loss-of-function mutations in *CBS* also leads to cognitive defects  
452 as observed in homocystinuria patients. Hence, this latter result confirm that DSF does  
453 affect *CBS* activity, directly or indirectly. Altogether these results confirm that the  
454 phenotypical consequences of the overexpression of *CBS* could be targeted by drugs  
455 to restore some of the cognitive performance altered in DS models. They also  
456 emphasize that the inhibition of *CBS*, direct or indirect, should be mild and only partial  
457 as a strong inhibition may be detrimental as illustrated by the cognitive dysfunction  
458 observed in homocystinuria and here in wt mice treated with DSF.

459

460 **Epistatic interaction between *Dyrk1a* and the *Abcg1-Cbs* region drives recognition**  
461 **memory in DS mouse models**

462           *Dyrk1a* is a major driver gene of DS cognitive defects (55) and a decrease in  
463 *Cbs* dosage is known to change the expression of *Dyrk1a* in brain and other organs

464 (56-58). Thus in order to test the functional interaction of *Cbs* and *Dyrk1a* overdosage,  
465 we combined the Dp1Yah with the Tg(*Dyrk1a*) mouse model, with *Dyrk1a* mRNA  
466 expression ratio around 1.5 compared to control littermate (32). Tg(*Dyrk1a*) mice  
467 present increased spontaneous activity compared to wt in the Open field test. This  
468 hyperactivity was also observed in the double transgenic Dp1Yah/Tg(*Dyrk1a*) while it  
469 was absent from Dp1Yah animals (Figure 5A; Student t test wt vs Dp1Yah  $p=0,460$ ;  
470 wt vs Tg(*Dyrk1a*)  $p=0.002$  and wt vs Dp1Yah/Tg(*Dyrk1a*)  $p=0.006$ ; Tg(*Dyrk1a*) vs  
471 Dp1Yah/Tg(*Dyrk1a*)  $p=0,200$ ). Hyperactivity was confirmed in the Y-maze, with both  
472 Tg(*Dyrk1a*) and Dp1Yah/Tg(*Dyrk1a*) having more arms visits than the controls and  
473 Dp1Yah (Figure 5B; Student t test wt vs Dp1Yah  $p=0,800$ ; wt vs Tg(*Dyrk1a*)  $p=0.005$   
474 and wt vs Dp1Yah/Tg(*Dyrk1a*)  $p=0.005$ ; Tg(*Dyrk1a*) vs Dp1Yah/Tg(*Dyrk1a*)  $p=0,881$ ).  
475 The working memory defect observed in the Y maze for Tg(*Dyrk1a*) mice was not  
476 rescued in Dp1Yah/Tg(*Dyrk1a*) double transgenics (Figure 5B; One way ANOVA  
477  $F(3,48)=4.14$   $p=0.011$ ; post hoc Tukey method wt vs Tg(*Dyrk1a*)  $p=0.042$ ; wt vs  
478 Dp1Yah/Tg(*Dyrk1a*)  $p=0,019$  and Tg(*Dyrk1a*) vs Dp1Yah/Tg(*Dyrk1a*)  $p=0.203$ ). Then,  
479 we tested the Novel Object Recognition memory after 1h of retention (Figure 5C). As  
480 expected, the 2 single mutants were impaired (Two ways ANOVA, variables  
481 “genotype” and “objects”:  $F(3;70)=7.09$  with  $p<0.001$ , post hoc Tukey Test: Dp1Yah  
482 “fam vs new”  $q=1.333$  and  $p=0.349$ ; Tg(*Dyr1a*)  $q=1.732$  and  $p=0.225$  - Recognition  
483 Index: One sample t-test mean vs 50%: Dp1Yah  $p=0.253$ ; Tg(*Dyrk1a*)  $p=497$ ) but the  
484 double transgenic mice Dp1Yah/Tg(*Dyrk1a*) were able to discriminate the novel object  
485 as wt littermates (Two ways ANOVA, variables “genotype” and “objects”:  $F(3;70)=7.09$   
486 with  $p<0.001$ , post hoc Tukey Test: wt “fam vs new”  $q=4.543$  and  $p=0.002$ ;  
487 Dp1Yah/Tg(*Dyr1a*)  $q=5.289$  and  $p<0.001$  - Recognition Index: One sample t-test: wt

488  $p=0.048$ ; Dp1Yah/Tg(*Dyrk1a*)  $p=0.011$ ), suggesting that the effects of *Dyrk1a*  
489 overexpression are compensated by 3 copies of the *Abcg1-Cbs* region.

490 Lastly we checked the learning and spatial memories using the Morris Water  
491 Maze task, followed by a probe test 24h after the learning period (Figure 5D). Even if  
492 all the groups increased their performance during the learning phase for reaching the  
493 platform after 6 days of training (J1-J6), wt and Dp1Yah mice found the platform with  
494 lower latency than the Tg(*Dyrk1a*) and Dp1Yah/Tg(*Dyrk1a*) (Two ways ANOVA  
495 variable genotype,  $F(3;280)=14.80$   $p<0.001$ ; post hoc Tuckey test: wt vs Tg(*Dyrk1a*)  
496  $q=6.160$  with  $p<0,001$ ; wt vs Dp1Yah/Tg(*Dyrk1a*)  $q=4.752$  with  $p=0.004$  – Dp1Yah vs  
497 Tg(*Dyrk1a*)  $q=8.103$  with  $p<0,001$ ; Dp1Yah vs Dp1Yah/Tg(*Dyrk1a*)  $q=6.641$  with  
498  $p<0,001$ ). During the probe test, 24h after the learning phase, controls and Dp1Yah  
499 animals were searching most of their time in the platform quadrant (T), whereas  
500 Tg(*Dyrk1a*) and double transgenic mice searched randomly across the entire space  
501 (One sample t-test vs 50% mean: wt  $p=0.02$ ; Dp1Yah  $p=0.05$ ; Tg(*Dyrk1a*)  $p=0.99$  and  
502 Dp1Yah/Tg(*Dyrk1a*)  $p=0.57$ ). Hence, overexpressing *Cbs* and *Dyrk1a* does not rescue  
503 the *Dyrk1a*-dosage dependent working and spatial memory deficits observed in the Y  
504 maze and the Morris water maze respectively neither the hyperactivity observed in the  
505 open-field, but rescued the object recognition impairment in the NOR.

506 **Proteomics unravels complex intermingled proteomic changes influenced by**  
507 **DYRK1A overexpression and by Dp1Yah trisomic genes**

508 In order to unravel the impact of CBS and DYRK1A on cellular mechanism within  
509 the hippocampus that could lead to the memory phenotype observed in the novel  
510 object recognition (NOR) test, we profiled the proteome in the hippocampi isolated from

511 Dp1Yah, Tg(*Dyrk1a*) and double (Dp1Yah,Tg(*Dyrk1a*)) animals, and compared them  
512 to the wt control littermates. We collected the samples after the behavioral evaluation  
513 and performed a Tandem Mass Tag labeling (Thermo Scientific, Illkirch) followed by  
514 LC-MS/MS orbitrap analysis. We were able to detect 1655 proteins of which 546 were  
515 detected in all the 3 genotypes with a variability below 40% (Supplementary table 3),  
516 and among which 338 proteins were expressed at the same level as control ones. A  
517 total of 208 proteins were found differentially expressed with levels of expression  
518 above 1.2 (206) or below 0.8 (2) in Dp1Yah, Tg(*Dyrk1a*) and double mutant mice  
519 (Figure 6A). Nine proteins were upregulated in all 3 genotypes: the RIKEN cDNA  
520 6430548M08 gene product (6430548M08RIK), Actin related protein 2/3 complex,  
521 subunit 1A (ARPC1A), Bridging Integrator 1 (BIN1), the Family with sequence similarity  
522 213, member A (Fam213a), Glyoxalase 1 (GLO1), Importin 5 (LPO5), NADH  
523 dehydrogenase (ubiquinone) Fe-S protein 1 (NDUFS1), Prostaglandin reductase 2  
524 (PTGR2) and Synaptosomal-associated protein 25 (SNAP25). Topcluster analysis of  
525 the protein content unraveled a general common network with interacting proteins  
526 modified by the 3 genetic conditions (Figure 6B-C). Functional analysis using gene  
527 ontology highlighted several cellular components affected in the 3 genotypes including  
528 synaptic particles, neuron projection, presynapse/synapse, axon, myelin sheath and  
529 different types of vesicles (Supplementary table 4). Cell/neuron projection  
530 development, morphogenesis, and differentiation, as well as secretion, synaptic and  
531 anterograde trans-synaptic signaling were affected in Dp1Yah while aldehyde  
532 catabolic processes and regulation of anatomical structure size were modified in  
533 Tg(*Dyrk1a*). Interestingly all these biological process were not be disturbed in double  
534 transgenic animals. Likewise molecular functions controlling ubiquitin protein ligase,  
535 calcium ion binding and dicarboxylic acid transmembrane transporter activity in



536 Dp1Yah, or cytoskeletal protein and myosin binding in Tg(*Dyrk1a*) were restored  
537 (Dp1Yah,Tg(*Dyrk1a*)). On the contrary oxidoreductase activity was newly modified in  
538 the double transgenic hippocampi.

539 We selected three proteins with different proteomic profiles in hippocampi and  
540 studied their expression in another brain region, the cerebral cortex, using western blot  
541 analysis: The alpha synuclein (SNCA), the Fused in sarcoma (FUS) that are  
542 associated with neurodegenerative disease (59-62) and the synaptosomal-associated  
543 protein 25 (SNAP25), a component of the SNARE complex involved in calcium-  
544 triggered exocytosis (63-65). As shown in figure 5D, levels of SNCA were similar to wt  
545 level. We did observe increased amount of this protein in the (Dp1Yah,Tg(*Dyrk1a*))  
546 animals contrary to what was observed in the proteome analysis. The presynaptic  
547 SNAP25 protein was significantly up-regulated in cortical regions of the  
548 (Dp1Yah,Tg(*Dyrk1a*)) animals and to a lesser extent in the Dp1Yah and Tg(*Dyrk1a*)  
549 ones (student t-test wt versus Tg(*Dyrk1a*)  $p=0,233$ ; wt versus Dp1Yah  $p=0,06$ ; wt  
550 versus D1Yah/Tg(*Dyrk1a*)  $p=0,02$ ). Hence, in the proteomic approach, we also  
551 observed the increase previously detected in the hippocampus of those three  
552 transgenic lines. The RNA-binding protein FUS was found overexpressed in the  
553 Dp1Yah brains and to a lesser extent in the (Dp1Yah,Tg(*Dyrk1a*)) ones, similarly to  
554 what was observed in the proteomic analysis (student t-test Dp1Yah compared to wt  
555  $p=0,02$  and D1Yah/Tg(*Dyrk1a*) compared to wt  $p=0,09$ ).

556

557 **DISCUSSION**

558           In this report we demonstrated that the genetic overdosage of *Cbs* is necessary  
559 and sufficient to induce defective novel object recognition in 3 different types of DS  
560 models. CBS overdosage is certainly the main driver of the learning and memory  
561 phenotypes detected previously in DS models for the Mmu17 region (22, 33) but we  
562 cannot rule out the possibility that one or more other gene(s) contribute with *Cbs* to the  
563 phenotype. Previous analysis of CBS overdosage with the same transgenic line  
564 Tg(*CBS*) on the FVB/N genetic background showed no change in fear learning task  
565 and locomotor activity but increased LTP-dependent synaptic plasticity (66); a  
566 phenomenon also detected *in vitro* and *in vivo* in other DS models where *Cbs* is  
567 trisomic in the C57BL/6J genetic background (22, 33). Nevertheless no positive effect  
568 on cognition is associated with increase CBS dosage as previously proposed by  
569 Régnier et al. (66). Instead the overdosage of CBS always impairs the hippocampal-  
570 dependent novel object recognition test suggesting that increased synaptic plasticity  
571 found in *Cbs* trisomic models may alter synaptic functions. Increased synaptic plasticity  
572 could occur via increased H<sub>2</sub>S as it has been shown that H<sub>2</sub>S facilitates LTP by  
573 stimulating the post-synaptic NMDA receptors (67, 68). Moreover, a role of H<sub>2</sub>S has  
574 been foreseen in calcium homeostasis regulation which is also crucial for neuronal  
575 synaptic plasticity (69).

576           DSF was isolated from a drug screening performed in yeast cells  
577 overexpressing CBS homolog Cys4p and looking for drugs counteracting its effect on  
578 methionine auxotrophy. Although DSF has been first identified as an inhibitor of  
579 mitochondrial aldehyde dehydrogenase (ALDH) (70), it is a relatively nontoxic  
580 substance, which has been on the market for more than 40 years to support the  
581 treatment of chronic alcoholism by producing an acute sensitivity to ethanol, thanks to

582 its ability to inhibit aldehyde dehydrogenases, thus leading to an accumulation of  
583 acetaldehyde in blood when alcohol is ingested. As acetaldehyde is responsible for  
584 many of the unpleasant effects that follow ingestion of large quantities of alcohol  
585 (“hangover”), DSF treatment discourages the patients to sustain a regular alcohol  
586 consumption by exacerbating and accelerating its unpleasant side effects. Our  
587 preliminary data about the mechanism of action of DSF suggest that this molecule may  
588 not directly inhibit CBS enzymatic activity but probably rather acts on the cellular  
589 consequences of CBS overexpression. The assay used for the screening, in principle,  
590 leads to the isolation of drugs acting both directly or not on CBS/Cys4. This latter point  
591 is of importance given that CBS may not be a druggable target enzyme. And indeed,  
592 at present, we do not know if the DSF is acting directly or indirectly on CBS but we  
593 must assume the function altered by CBS overdosage, whatever it is, is conserved and  
594 similarly sensitive to DSF treatment in both yeast and mouse. Of note, upon absorption  
595 DSF is rapidly reduced to diethyldithiocarbamate (DDC), which then reacts with thiol  
596 groups. Both DSF and DCC are potent copper chelators, thereby possibly affecting the  
597 activity of copper-dependent enzymes such as monooxygenases, the Cu-Zn  
598 superoxide dismutase, amine oxidase, ADN methyltransferases and cytochrome  
599 oxidase. As a result, DSF has been shown to affect various cellular processes such as  
600 cocaine metabolism and catecholamine synthesis, and proteasome inhibition, and is  
601 thus under study for multiple clinical applications that include struggle against alcohol  
602 addiction, cancer chemotherapy, treatment of copper-related disorders and anti-viral  
603 treatment for hepatitis C and Human Immunodeficiency Virus (71). Here, we describe  
604 a new possible clinical application of DSF in DS cognition through its effect on CBS  
605 overexpression. CBS clearly represents a new relevant therapeutic target for improving  
606 DS cognition and DSF, as such, opens new therapeutic avenues in DS patients.

607 We also demonstrated that *CBS* interacts genetically with *Dyrk1a*, a well-known  
608 therapeutic target for DS. Mutual relationships between *DYRK1A* and *CBS* were  
609 shown previously, with decreased *DYRK1A* protein observed in the liver (Hamelet et  
610 al. 2009) and increased expression observed in the brain of *Cbs*<sup>+/-</sup> mice (Planque et  
611 al. 2013), while overexpression (or under-expression) of *DYRK1A* induce accumulation  
612 (or reduction) of *CBS* expression in the liver (72). In order to explore the genetic  
613 interactions between *DYRK1A* and *CBS*, we overexpressed *Dyrk1a* in the Dp1Yah  
614 context by combining the Tg(*Dyrk1a*) and the Dp1Yah mice. Surprisingly, this  
615 experiment restored the object recognition deficit observed in the Dp1Yah mouse  
616 model but neither the increased locomotor activity in the open-field or the Y maze, nor  
617 the working and spatial memory deficits. Thus the compensation is restricted to a  
618 specific cognitive function, recognition memory, which is defective in both TgDyrk1a  
619 and Dp1Yah models. Why this dosage effect is restricted to recognition memory  
620 remains speculative. We may hypothesize that *Cbs* and *Dyrk1a* overdosage only  
621 interact in specific regions of the adult brain involved in object discrimination explaining  
622 why the increased locomotor activity and the working and visuo-spatial phenotypes  
623 induced in Tg(*Dyrk1a*) animals are not affected. Alternatively, objects recognition  
624 deficit is likely to result from an impact of *DYRK1A* on adult brain function while the  
625 other phenotypes are the result of an impact during earlier stage of brain development.  
626 On the one hand, object recognition has been shown to require undamaged  
627 hippocampal perforant path connecting ento/perirhinal cortex with the dentate gyrus  
628 for long retention intervals (> 15 min) in rat (73-78). On the other hand, synaptic  
629 exchanges between the median prefrontal cortex (mPFC) and the hippocampus seems  
630 to be sufficient to support the processing of short-term memory such as working  
631 memory observed in the Y maze (79, 80) and hyperactivity is associated with the

632 prefrontal cortex, basal ganglia and cerebellum (81-84). Moreover, long-term  
633 recognition memory has been shown to appear in the rat at weaning (post-natal day  
634 21 in the mouse), (85), a period corresponding to the end of neurogenesis and  
635 synaptogenesis in the dentate of the hippocampus, and reflecting the general  
636 observation of 'infantile amnesia' observed on long-term memory tasks but not on  
637 short-term memory ability (86).

638 Our proposal go farther than the demonstration by Zhang et al (23) that the  
639 Hsa21 homologous region on the Mmu17 is a key determinant cognitive deficits in DS  
640 mouse models. We showed here that CBS is a key gene for DS related phenotypes in  
641 mice with the other homologous interval *Cbr3-Fam3b* located on Mmu16,  
642 encompassing *Dyrk1a*. We should also consider that in people with DS, both genes  
643 are trisomic and thus the recognition memory deficit observed in DS persons and in  
644 the complete T21 mouse model (87) certainly depends not only on the interplay  
645 between DYRK1A and CBS but also on interaction with other Hsa21 genes that may  
646 affect different pathways or different parts of the brain.

647 The molecular mechanisms involved in *Cbs-Dyrk1a* genetic interaction have  
648 been investigated through a quantitative proteomic approach. Although limited due to  
649 the complexity of the hippocampus, the results highlight proteins networks interactions  
650 between the two trisomic regions. 208 proteins were found deregulated, corresponding  
651 to 148 GO categories and pathways, with 72 specific to Dp1Yah (out of 121) and 9 to  
652 *Dyrk1a* transgenic model (out of 32; Supplementary table 3) and 5 common to both  
653 Dp1Yah and Tg(*Dyrk1a*). More interestingly, GO terms such as cortical cytoskeleton  
654 or cytoskeletal protein binding were respectively affected in Dp1Yah and in the  
655 Tg(*Dyrk1a*) but were restored in the double transgenic animals, unravelling somehow

656 the nature of the pathways controlled by the epistatic interaction between CBS and  
657 DYRK1A overdosage. DYRK1A is found mainly associated to and modulates the actin  
658 cytoskeleton (88). CBS is the major enzyme involved in H<sub>2</sub>S production in the central  
659 nervous system (67). Interestingly increase of H<sub>2</sub>S activates RAC1 leading to  
660 rearrangement of actin cytoskeleton during endothelial cell migration (89). Thus a  
661 simple hypothesis would be that the overdosage of CBS will lead to increased H<sub>2</sub>S  
662 production and further activation of RAC1 with effect on actin cytoskeleton  
663 rearrangement, a key mechanism involved in synaptic transmission. Remarkably  
664 DYRK1A interacts with p120-Catenin-Kaiso and can then modulate Rac1 (90). Thus  
665 one working hypothesis is based on CBS and DYRK1A pathways connected through  
666 RAC1.

667 DYRK1A is the main driver of defects in DS mouse models for the homologous  
668 region to Hsa21 located on Mmu16 (55). Based on study done in DS models for the  
669 Mmu16 homologous region (91), DYRK1A has been selected as a drug target. As  
670 reported previously, a treatment with epigallocatechin-3-gallate (EGCG), an inhibitor  
671 of DYRK1A kinase activity, can restore some cognitive aspects found altered in people  
672 with DS but the gain was limited (92, 93). Nevertheless our results, by adding CBS to  
673 the limited number of DS therapeutic targets, may improve the efficiency of DS  
674 treatment, in particular by combining multiple therapies for improving the life of DS  
675 patients. Finally, an important point to emphasize is that, for DYRK1A as well as for  
676 CBS, both loss of function mutations and overdosage lead to intellectual deficiencies.  
677 This is important to keep in mind when considering pharmacological intervention that  
678 aims at inhibiting one or the other, or both, of these enzymes. Therefore, drug  
679 treatment that lead to only a mild inhibition of CBS and/or DYRK1A should be favoured.

680

## 681 **ACKNOWLEDGEMENTS**

682 We thank Dr David Patterson for granting access to the 60.4P102D1 transgenic mice,  
683 and Dr. Nathalie Janel for providing the CBS KO mice, Dr. Henri Blehaut for his initial  
684 support on the study and the Fondation Jerome Lejeune for making the transgenic line  
685 available and their support. We are grateful to members of the research group, of the  
686 proteomic platform of the IGBMC laboratory, and of the Mouse Clinical institute (MCI-  
687 ICS) for their help and helpful discussion during the project. The project was supported  
688 by the French National Centre for Scientific Research (CNRS), the French National  
689 Institute of Health and Medical Research (INSERM), the ITMO (“Institut Thématique  
690 Multiorganisme”) BCDE (“Biologie Cellulaire, Développement & Evolution”), the  
691 University of Strasbourg and the “Centre Europeen de Recherche en Biomedecine”,  
692 the “Fondation Jerome Lejeune” and the French state funds through the “Agence  
693 Nationale de la Recherche” under the frame programme Investissements d’Avenir  
694 labelled (ANR-10-IDEX-0002-02, ANR-10-LABX-0030-INRT, ANR-10-INBS-07  
695 PHENOMIN). The funders had no role in study design, data collection and analysis,  
696 decision to publish, or preparation of the manuscript.

697

## 698 **LEGENDS TO FIGURES**

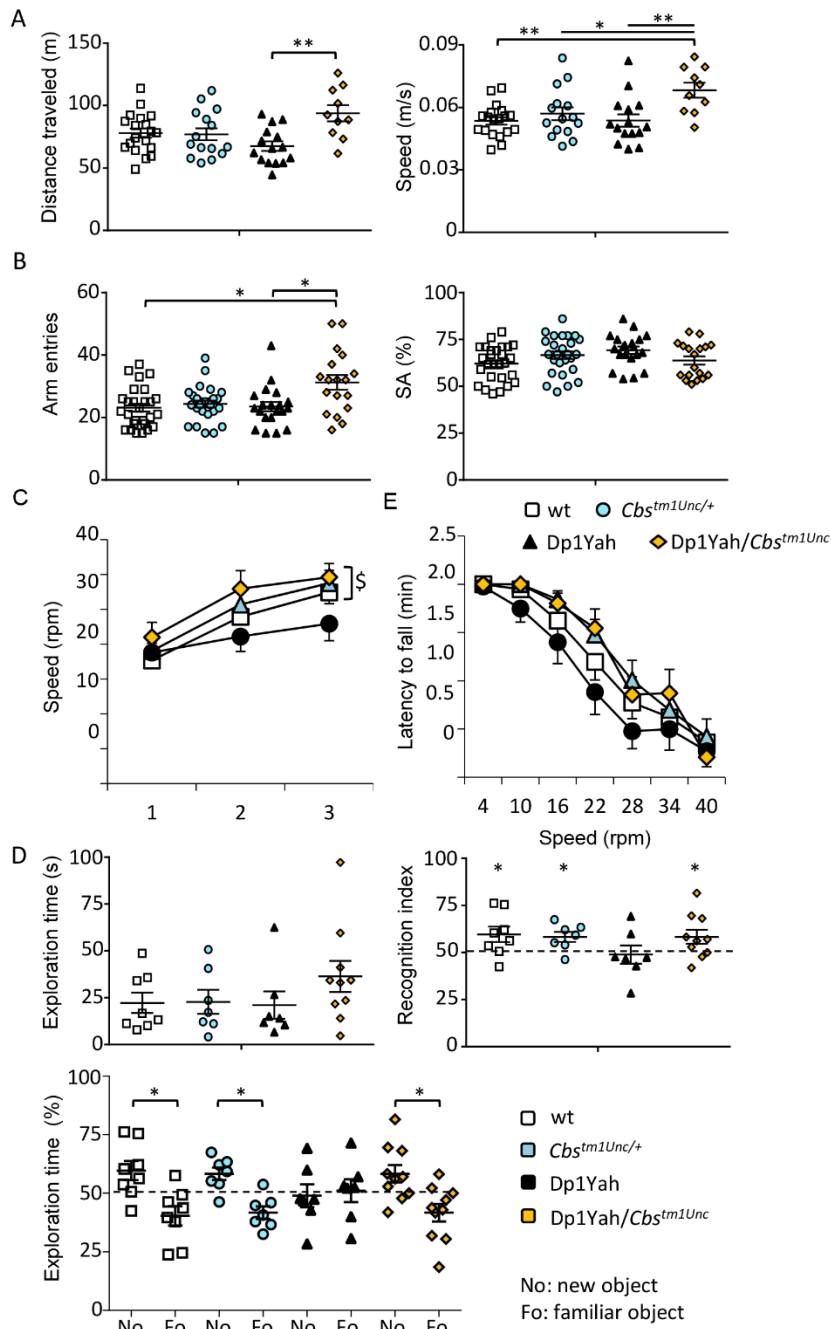

699

700 **Figure 1: The Dp1Yah phenotypes are dependent on *Cbs* dosage.**

701 Dp1Yah trisomic mice (n=23) were compared with Dp1Yah carrying a KO of *Cbs*  
 702 (Dp1Yah/*Cbs*<sup>tm1Unc</sup>, n=21), *Cbs*<sup>tm1Unc/+</sup> (n=23) and wt littermates (n=29). Animals were  
 703 analysed for the open field (A), the Y maze (B) and the novel object recognition (D) in  
 704 two independent cohorts; the rotarod (C) was assessed on one cohort with wt (n=18)



705 *Cbs<sup>tm1Unc/+</sup>* (n=15), *Dp1Yah* (n=15) and *Dp1Yah/Cbs<sup>tm1Unc</sup>* (n=10) littermates. (A)  
706 Distance travelled and medium speed during the 30min of the test were increased in  
707 the *Dp1Yah/Cbs<sup>tm1Unc</sup>* compared to the wild type genotype. (B) Increased exploration  
708 activity was confirmed for the *Dp1Yah/Cbs<sup>tm1Unc</sup>* mice compared to control littermates  
709 in the Y maze while spontaneous alternation was not affected. (C) During the training  
710 session (left panel), the *Dp1Yah* mice were not able to improve their performance on  
711 the rotarod by increasing the maximum of speed before they fall from the rod compared  
712 to the other genotype. Nevertheless no change was observed between individuals with  
713 the four genotypes during the test phase (right panel). (D) The exploration time in the  
714 first session of the novel object recognition (left upper panel) was not statistically  
715 different in the four genotypes but during the recognition phase, after 10 min of  
716 retention, the recognition index (right upper panel; time spent on the new object / total  
717 time of exploration) was clearly lower in *Dp1Yah* mice as compared to the other  
718 genotypes and not statistically different from chance (50%). Accordingly the  
719 exploration time (left lower panel) spent by the *Dp1Yah/Cbs<sup>tm1Unc</sup>* mice to explore the  
720 object showed that they were able to differentiate the novel (No) versus the familiar  
721 (Fo) object while the *Dp1Yah* were not. Data are represented as one point per  
722 individual tested and the mean of the group. (Values represent means + S.E.M.  
723 \*P<0.05, \*\*P<0.01, \*\*\*P<0.001).

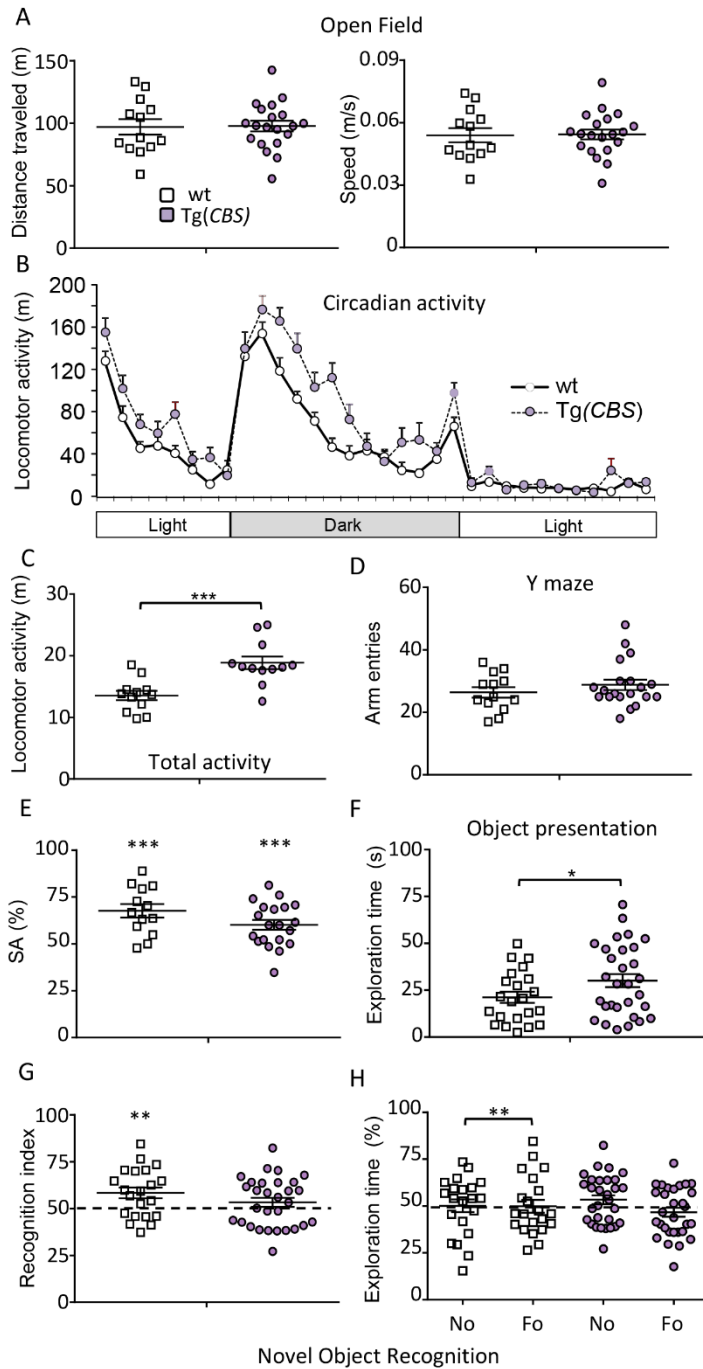

724

725 **Figure 2: Transgenic mice overexpressing human CBS display DS-related**  
726 **behaviour phenotypes.**

727 Wt (n=13) and Tg(CBS)/0 littermates (n=17), hemizygotes for a human PAC containing  
728 the CBS gene, were tested for open field (A), circadian actimetry (B,C), Y maze (D-E)

729 and novel object recognition (F,G and H). No phenotype was found in the Tg during  
730 the exploration of a new environment in the open field in the total distance travelled  
731 (left) and the speed (right) but increased activity was observed during home cage  
732 monitoring over a light-dark-light cycle (B) with an increase of the distance travelled  
733 (C). In the Y maze (E), Tg(*CBS*)/0 animals displayed altered spontaneous alternation  
734 with no change in the number of arm entries (D). In the novel object recognition (F),  
735 Tg(*CBS*)/0 mice displayed similar exploration activity compared to wt littermates but  
736 they do not discriminate the novel versus the familiar object when looking at the  
737 discrimination index (G) and the percentage of exploration time for both objects (H).  
738 (Values represent means + S.E.M. \*P<0.05, \*\*P<0.01, \*\*\*P<0.001).

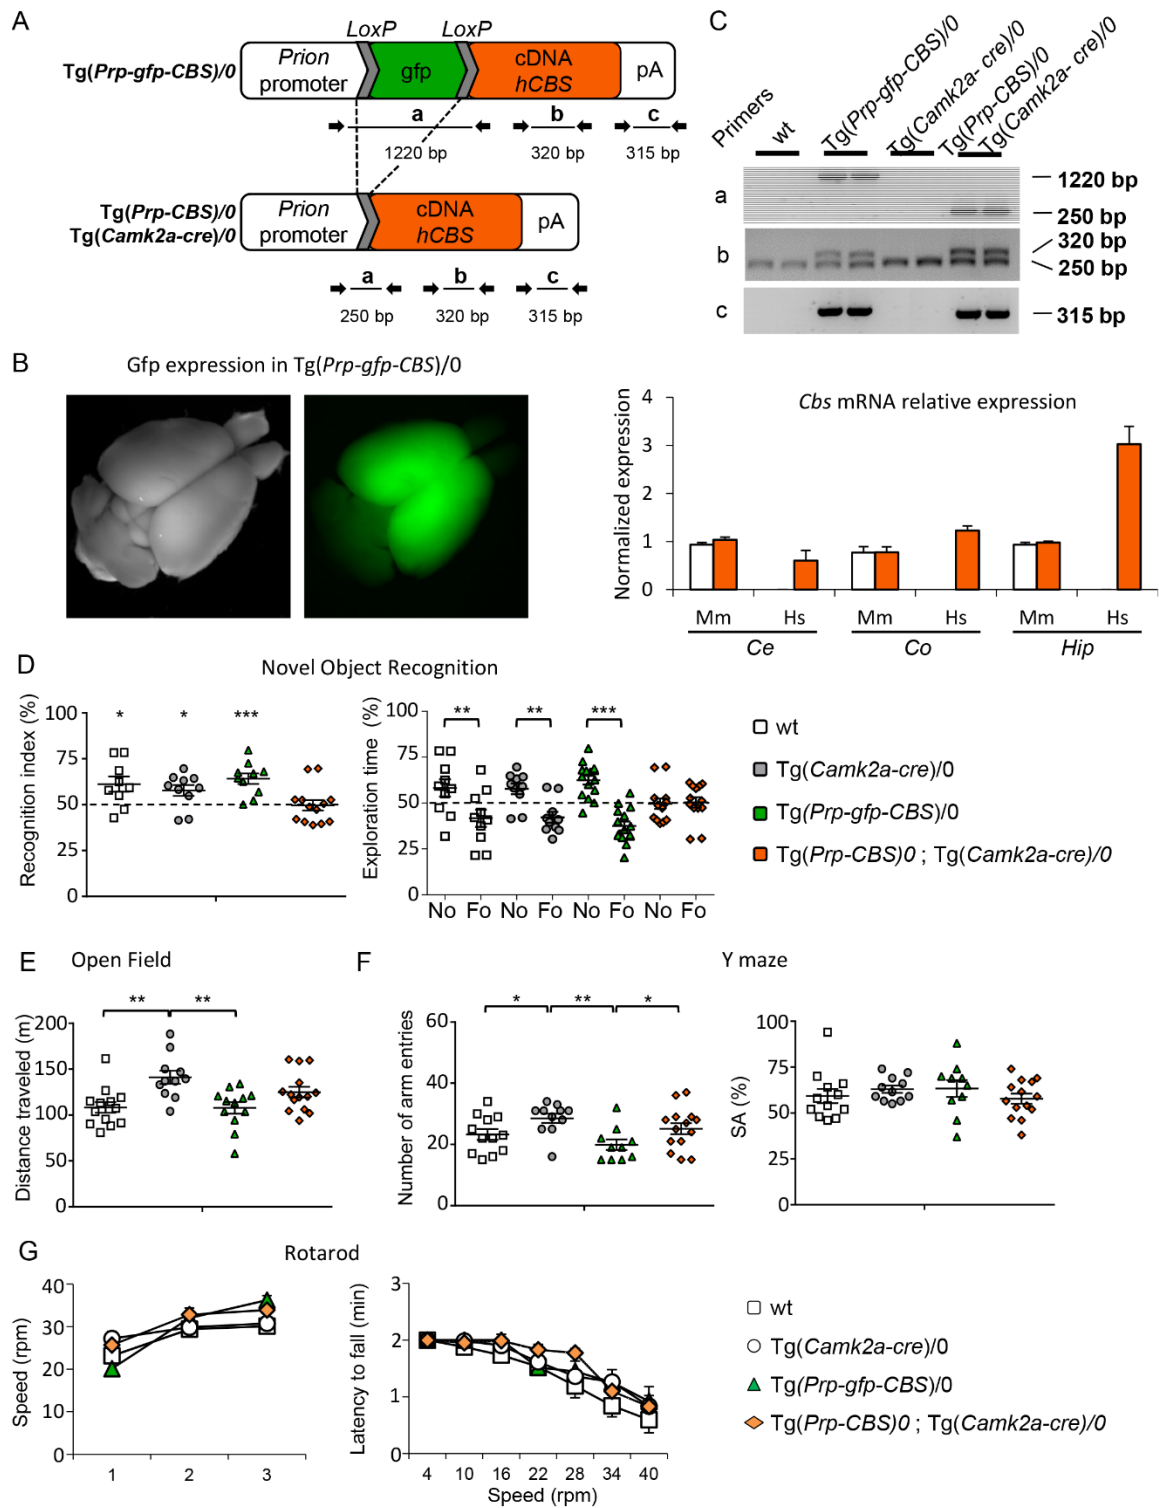

739

740 **Figure 3: Selective overexpression of *hCBS* in the glutamatergic neurons leads**  
 741 **to impaired object recognition and altered locomotor activity.**

742 (A) a conditional transgene *Tg(Prp-gfp-CBS)* was designed to overexpress the human  
743 CBS cDNA from the murine Prion promoter after the deletion of an interrupting GFP-  
744 coding cassette flanked by loxP sites. The GFP allowed to select one line that lead to  
745 expression in the anterior part of the brain (B). When Cre is expressed from the  
746 *Tg(Camk2-Cre)* transgene, the deletion can be monitored in the brain of the animals  
747 (C) and the overexpression of hCBS mRNA is detected in different part of the brain of  
748 the *Tg(Camk2-Cre)/0;Tg(Prp-gfp-CBS)/0* animals (Hs, orange bar, B) with no change  
749 in the endogeneous murine CBS without Cre expression detected in wt animals (Mm,  
750 white bar B) or *Tg(Camk2-Cre)/0;Tg(Prp-gfp-CBS)/0* animals (Mm, orange bar, B). Wt  
751 (n=13), *Tg(Camk2-Cre)/0* (n=11), *Tg(Prp-gfp-CBS)/0* (n=12), and *Tg(Camk2-*  
752 *Cre)/0;Tg(Prp-gfp-CBS)/0* (n=14) littermates were evaluated through for object  
753 discrimination (D), open field (E), Y maze (F), rotarod (G). Mice overexpressing hCBS  
754 in the glutamatergic neurons were unable to discriminate the novel versus the familiar  
755 object as compared to the other control genotypes (D). *Tg(Camk2-Cre)/0* mice  
756 displayed an enhanced locomotor activity in the open field but no change was detected  
757 in the control, wt and *Tg(Prp-gfp-CBS)/0*, or in double transgenic animals (E). In the Y  
758 maze animals carrying the *Tg(Prp-gfp-CBS)/0* or the activated form, *Tg(Camk2-*  
759 *Cre)/0;Tg(Prp-gfp-CBS)/0*, displayed reduced exploration with a lower number of arm  
760 entries but no change in the spontaneous alternation (F). No phenotypes was altered  
761 in the rotarod test with similar progress during the learning and the test phases (G).  
762 (Values represent means + S.E.M. \*P<0.05, \*\*P<0.01, \*\*\*P<0.001)

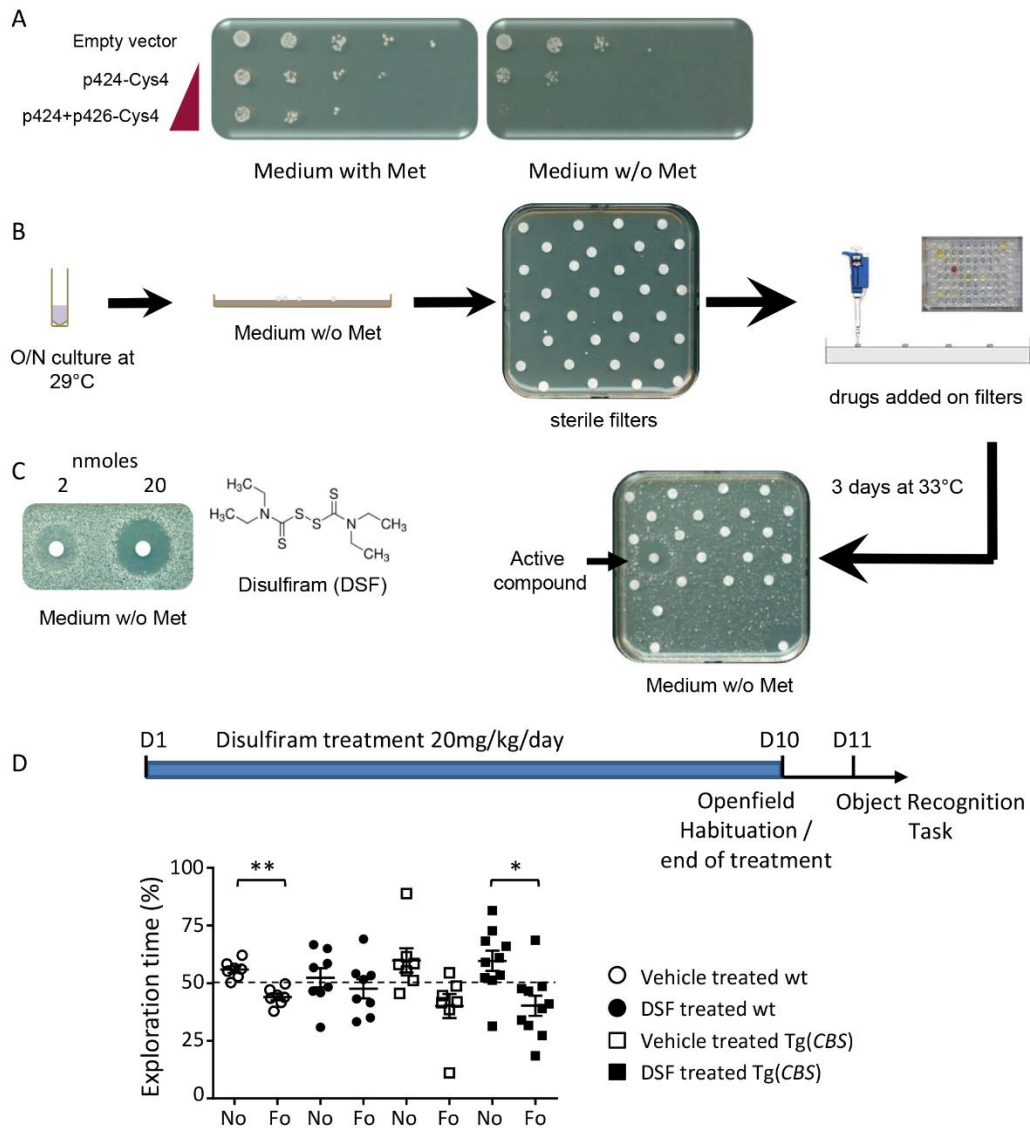

763

764 **Figure 4. Pharmacological intervention to suppress the consequence of CBS**  
 765 **overexpression in yeast (A, B and C) and mouse (D).** Development of a yeast  
 766 screening assay based on Cys4-overexpressing cells and identification of DSF as able  
 767 to suppress methionine auxotrophy induced by Cys4 overexpression. The sensitivity  
 768 of the strain to the absence of methionine in the medium was evidenced by serial  
 769 dilutions of a yeast strain expressing different levels of Cys4 (A). For the drug  
 770 screening, the yeast strain overexpressing Cys4 from both p424 & p426 multicopy 2  $\mu$   
 771 plasmids was spread on a square Petri plate containing solid agar-based methionine-

772 free medium. DMSO was used as a negative control and added to the upper right filter  
773 and methionine, the positive control, was deposited on the bottom left filter (B). At the  
774 remaining positions, individual compounds from the chemical libraries were added, and  
775 plates were incubated for 3 d at 33 °C. The dose-dependent effect of DSF on Cys4-  
776 overexpressing cells is shown, and its molecular structure is depicted (C). Note that  
777 DSF is toxic at high concentrations (close to the filter) whereas it becomes active at  
778 sub-toxic concentrations. To test DSF in mice, a treatment was done on Tg(*CBS*)  
779 cohort starting at D1 and ending at D10 (D). Each groups received a daily dose of  
780 10mg/kg/day of DSF for 10 days followed by an open field paradigm (D10) with the  
781 object recognition test performed on D11 (with one hour of retention time). The graph  
782 at the bottom showed the percentage of time spent on the novel versus the familiar  
783 object during the tests. The vehicule-treated wt mice were able to distinguish both  
784 objects as the DSF-treated Tg(*CBS*) animals. On the contrary non-treated transgenic  
785 animals were not able to do so and the DSF-treated wt animals were impaired in the  
786 test confirming that the drug affects CBS activity *in vivo* (Values represent means +  
787 S.E.M. \*P<0.05, \*\*P<0.01, \*\*\*P<0.001).

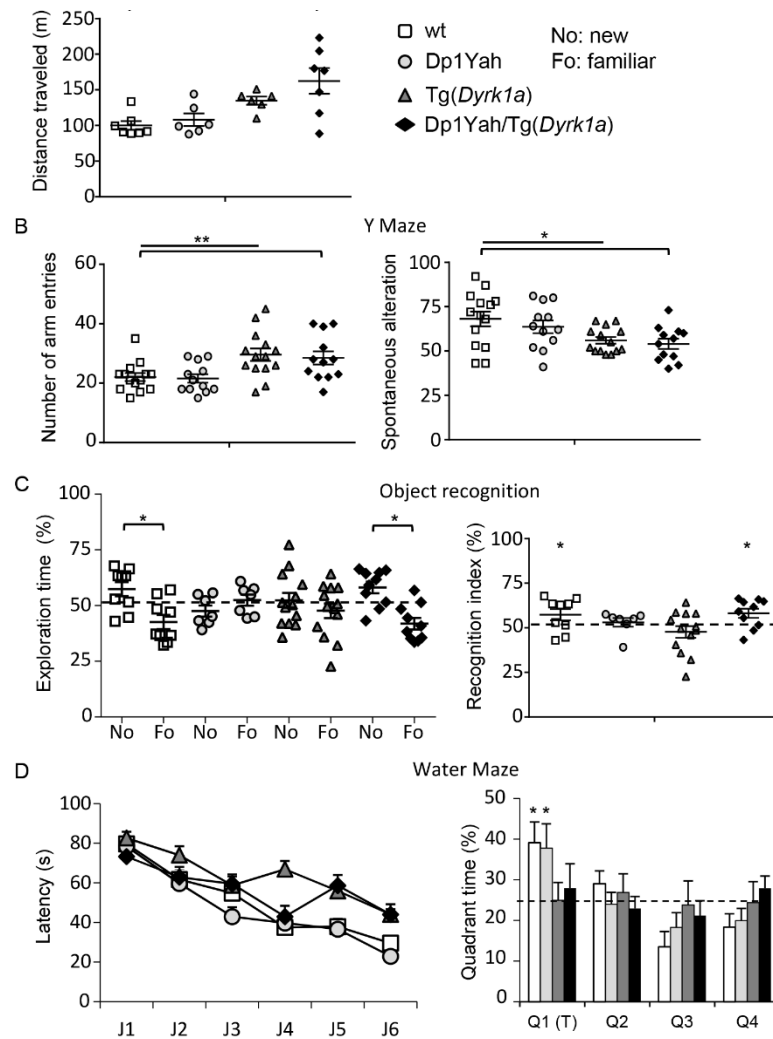

788

789 **Figure 5: CBS and DYRK1A overdosages interact for controlling behaviour and**  
 790 **cognition**

791 Behavioural and cognitive analysis of transgenic animals overexpressing *Cbs* and  
 792 *Dyrk1a* (14 wt, 15 Tg(*Dyrk1a*), 13 Dp1Yah and 13 Dp1Yah/Tg(*Dyrk1a*)) mutant mice  
 793 in the open field (A), the Y maze (B), the object recognition (C) and the Morris water  
 794 maze (D). Increased activity in the open field (A) and in the number of arm entries in  
 795 the Y maze (B) were found in the Tg(*Dyrk1a*) and Dp1Yah/Tg(*Dyrk1a*) animals with  
 796 also reduced spontaneous alternation in the Y maze (B). Both the Dp1Yah and  
 797 Dp1Yah/Tg(*Dyrk1a*) mutant mice were impaired in object recognition (C) but the



798 double mutant animals showed restored object discrimination similar to wt littermates.  
799 The Tg(*Dyrk1a*) and Dp1Yah/Tg(*Dyrk1a*) animals displayed delayed learning in the  
800 Morris water maze with no memory of the platform location in the probe test compared  
801 to Dp1Yah and wt littermates (D). (Values represent means + S.E.M. \*P<0.05,  
802 \*\*P<0.01, \*\*\*P<0.001)

Figure 6

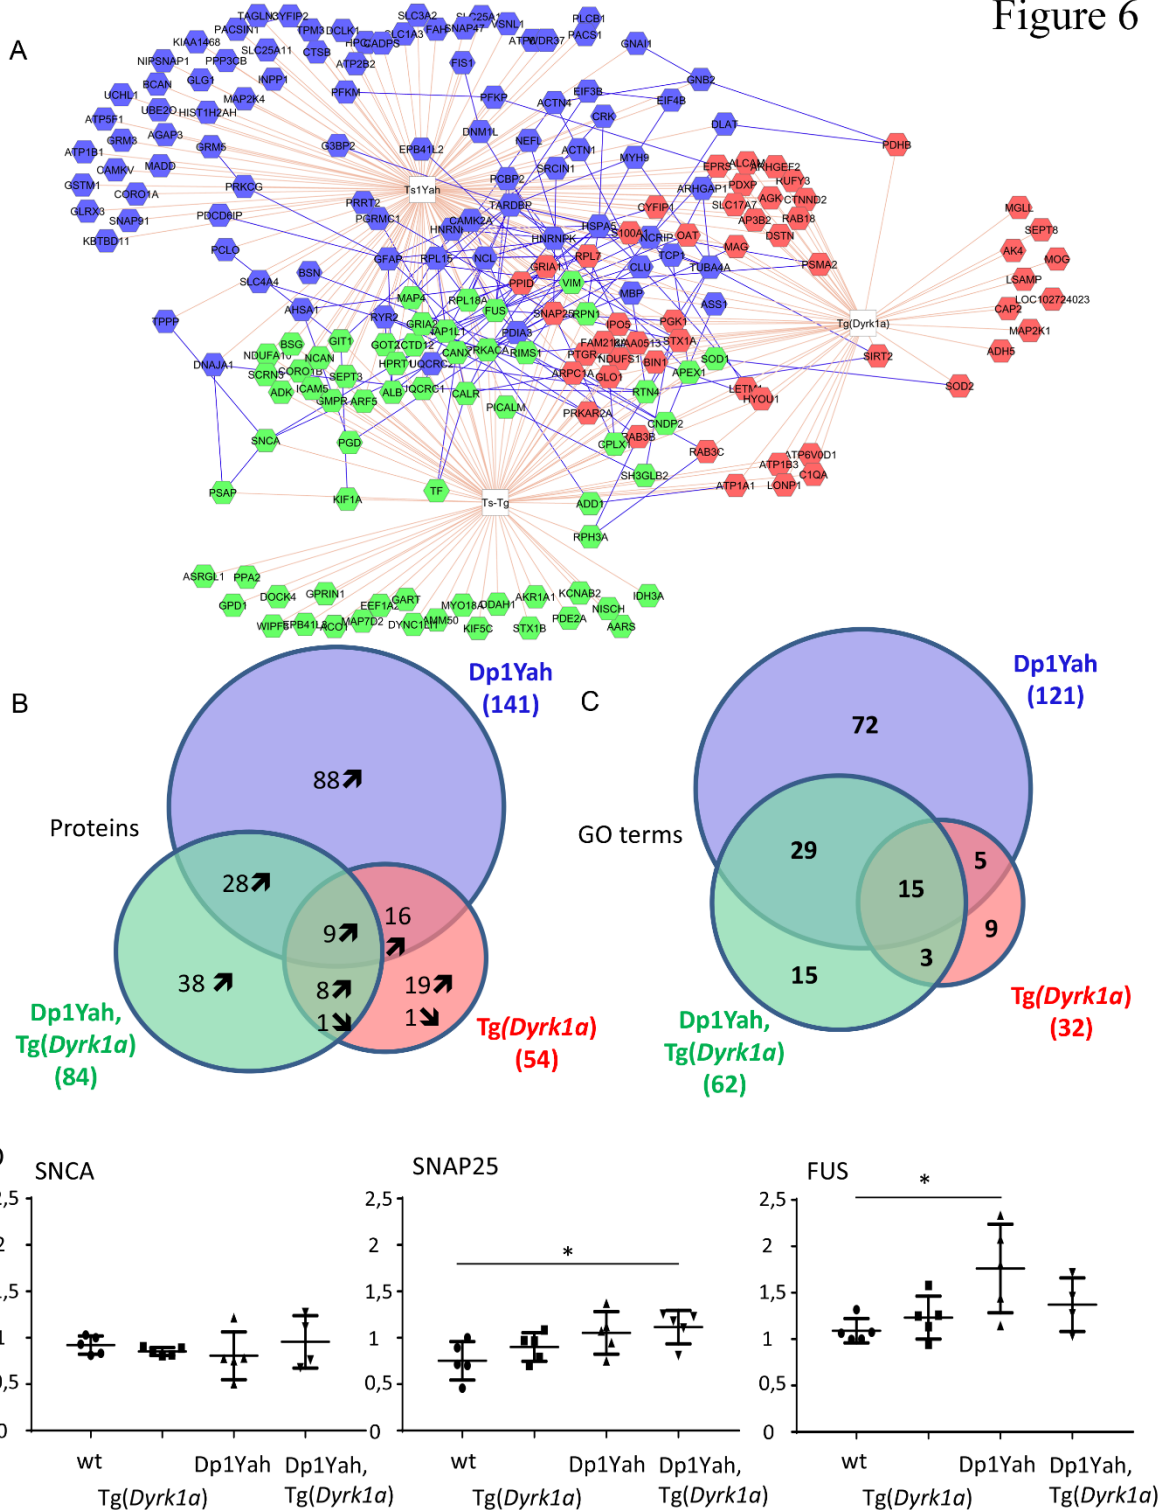

806 (A) Analyzing the 1655 proteins detected in the Orbitrap ELITE experiment, we  
807 extracted from Proteome Discoverer 1.4 © a list of 208 proteins dysregulated in our  
808 different sample conditions. The association between proteins, pathways and  
809 genotype is summarized in two Venn diagrams (B-C). We deduced that the trisomic  
810 alleles induced most of the perturbations; moreover, the combination of increased  
811 DYRK1A and trisomic condition led to new dysregulations. (D) Western blot  
812 validation of 3 protein candidates SNCA, SNAP25 and FUS. SNAP25 expression is  
813 increased in samples overexpressing DYRK1A. More interestingly, FUS was found  
814 significantly upregulated in Dp1Yah - plots represent every sample values normalized  
815 with  $\beta$ -actin level). (Values represent means + S.E.M. \*P<0.05, \*\*P<0.01, \*\*\*P<0.001)

## 816 REFERENCES

- 817 1. Korbelt JO, *et al.* (2009) The genetic architecture of Down syndrome phenotypes revealed by  
818 high-resolution analysis of human segmental trisomies. *Proceedings of the National Academy*  
819 *of Sciences of the United States of America* 106(29):12031-12036.
- 820 2. Lyle R, *et al.* (2009) Genotype-phenotype correlations in Down syndrome identified by array  
821 CGH in 30 cases of partial trisomy and partial monosomy chromosome 21. *European Journal*  
822 *of Human Genetics* 17(4):454-466.
- 823 3. Reeves RH, *et al.* (1995) A MOUSE MODEL FOR DOWN-SYNDROME EXHIBITS LEARNING AND  
824 BEHAVIOR DEFICITS. *Nature Genetics* 11(2):177-184.
- 825 4. Yu T, *et al.* (2010) A mouse model of Down syndrome trisomic for all human chromosome 21  
826 syntenic regions. *Human Molecular Genetics* 19(14):2780-2791.
- 827 5. Duchon A, *et al.* (2011) The telomeric part of the human chromosome 21 from Cstb to Prmt2  
828 is not necessary for the locomotor and short-term memory deficits observed in the Tc1 mouse  
829 model of Down syndrome. *Behavioural Brain Research* 217(2):271-281.
- 830 6. Glahn DC, Thompson PM, & Blangero J (2007) Neuroimaging endophenotypes: strategies for  
831 finding genes influencing brain structure and function. *Hum Brain Mapp* 28(6):488-501.
- 832 7. Brault V, *et al.* (2015) Opposite phenotypes of muscle strength and locomotor function in  
833 mouse models of partial trisomy and monosomy 21 for the proximal Hspa13-App region. *PLoS*  
834 *Genet* 11(3):e1005062.

- 835 8. Herault Y, Duchon A, Velot E, Maréchal D, & Brault V (2012) The in vivo Down syndrome  
836 genomic library in mouse. *Prog Brain Res* 197:169-197.
- 837 9. Jiang X, *et al.* (2015) Genetic dissection of the Down syndrome critical region. *Hum Mol Genet.*
- 838 10. Hall JH, *et al.* (2016) Tc1 mouse model of trisomy-21 dissociates properties of short- and long-  
839 term recognition memory. *Neurobiol Learn Mem* 130:118-128.
- 840 11. Lana-Elola E, *et al.* (2016) Genetic dissection of Down syndrome-associated congenital heart  
841 defects using a new mouse mapping panel. *Elife* 5.
- 842 12. Salehi A, *et al.* (2006) Increased App expression in a mouse model of Down's syndrome disrupts  
843 NGF transport and causes cholinergic neuron degeneration. *Neuron* 51(1):29-42.
- 844 13. García-Cerro S, *et al.* (2014) Overexpression of Dyrk1A is implicated in several cognitive,  
845 electrophysiological and neuromorphological alterations found in a mouse model of Down  
846 syndrome. *PLoS One* 9(9):e106572.
- 847 14. Altafaj X, *et al.* (2013) Normalization of Dyrk1A expression by AAV2/1-shDyrk1A attenuates  
848 hippocampal-dependent defects in the Ts65Dn mouse model of Down syndrome. *Neurobiol*  
849 *Dis* 52:117-127.
- 850 15. Guedj F, *et al.* (2009) Green tea polyphenols rescue of brain defects induced by overexpression  
851 of DYRK1A. *PLoS One* 4(2):e4606.
- 852 16. De la Torre R, *et al.* (2014) Epigallocatechin-3-gallate, a DYRK1A inhibitor, rescues cognitive  
853 deficits in Down syndrome mouse models and in humans. *Mol Nutr Food Res* 58(2):278-288.
- 854 17. de la Torre R, *et al.* (2016) Safety and efficacy of cognitive training plus epigallocatechin-3-  
855 gallate in young adults with Down's syndrome (TESDAD): a double-blind, randomised, placebo-  
856 controlled, phase 2 trial. *Lancet Neurol* 15(8):801-810.
- 857 18. Kim H, *et al.* (2016) A chemical with proven clinical safety rescues Down-syndrome-related  
858 phenotypes in through DYRK1A inhibition. *Dis Model Mech* 9(8):839-848.
- 859 19. Nakano-Kobayashi A, *et al.* (2017) Prenatal neurogenesis induction therapy normalizes brain  
860 structure and function in Down syndrome mice. *Proc Natl Acad Sci U S A* 114(38):10268-10273.
- 861 20. Neumann F, *et al.* (2018) DYRK1A inhibition and cognitive rescue in a Down syndrome mouse  
862 model are induced by new fluoro-DANDY derivatives. *Sci Rep* 8(1):2859.
- 863 21. Pereira PL, *et al.* (2009) A new mouse model for the trisomy of the Abcg1-U2af1 region reveals  
864 the complexity of the combinatorial genetic code of down syndrome. *Human Molecular*  
865 *Genetics* 18(24):4756-4769.
- 866 22. Yu T, *et al.* (2010) Effects of individual segmental trisomies of human chromosome 21 syntenic  
867 regions on hippocampal long-term potentiation and cognitive behaviors in mice. *Brain*  
868 *Research* 1366:162-171.

- 869 23. Zhang L, *et al.* (2014) Human chromosome 21 orthologous region on mouse chromosome 17  
870 is a major determinant of Down syndrome-related developmental cognitive deficits. *Hum Mol*  
871 *Genet* 23(3):578-589.
- 872 24. Sahún I, *et al.* (2014) Cognition and Hippocampal Plasticity in the Mouse Is Altered by  
873 Monosomy of a Genomic Region Implicated in Down Syndrome. *Genetics* 197(3):899-912.
- 874 25. Marechal D, Lopes Pereira P, Duchon A, & Herault Y (2015) Dosage of the Abcg1-U2af1 region  
875 modifies locomotor and cognitive deficits observed in the Tc1 mouse model of Down  
876 syndrome. *PLoS One* 10(2):e0115302.
- 877 26. Kimura H (2011) Hydrogen sulfide: its production, release and functions. *Amino Acids*  
878 41(1):113-121.
- 879 27. Chen X, Jhee KH, & Kruger WD (2004) Production of the neuromodulator H<sub>2</sub>S by cystathionine  
880 beta-synthase via the condensation of cysteine and homocysteine. *J Biol Chem* 279(50):52082-  
881 52086.
- 882 28. Kamat PK, Kalani A, & Tyagi N (2015) Role of hydrogen sulfide in brain synaptic remodeling.  
883 *Methods Enzymol* 555:207-229.
- 884 29. Watanabe M, *et al.* (1995) MICE DEFICIENT IN CYSTATHIONINE BETA-SYNTHASE - ANIMAL-  
885 MODELS FOR MILD AND SEVERE HOMOCYST(E)INEMIA. *Proceedings of the National Academy*  
886 *of Sciences of the United States of America* 92(5):1585-1589.
- 887 30. Butler C, Knox AJ, Bowersox J, Forbes S, & Patterson D (2006) The production of transgenic  
888 mice expressing human cystathionine beta-synthase to study Down syndrome. *Behav Genet*  
889 36(3):429-438.
- 890 31. Mantamadiotis T, *et al.* (2002) Disruption of CREB function in brain leads to  
891 neurodegeneration. *Nat Genet* 31(1):47-54.
- 892 32. Guedj F, *et al.* (2012) DYRK1A: a master regulatory protein controlling brain growth. *Neurobiol*  
893 *Dis* 46(1):190-203.
- 894 33. Lopes Pereira P, *et al.* (2009) A new mouse model for the trisomy of the Abcg1-U2af1 region  
895 reveals the complexity of the combinatorial genetic code of down syndrome. *Hum Mol Genet*  
896 18(24):4756-4769.
- 897 34. Mumberg D, Muller R, & Funk M (1995) YEAST VECTORS FOR THE CONTROLLED EXPRESSION  
898 OF HETEROLOGOUS PROTEINS IN DIFFERENT GENETIC BACKGROUNDS. *Gene* 156(1):119-122.
- 899 35. Ito H, Fukuda Y, Murata K, & Kimura A (1983) Transformation of intact yeast cells treated with  
900 alkali cations. *J Bacteriol* 153(1):163-168.
- 901 36. Kim AK & Souza-Formigoni MLO (2010) Disulfiram impairs the development of behavioural  
902 sensitization to the stimulant effect of ethanol. *Behavioural Brain Research* 207(2):441-446.
- 903 37. Karp NA, *et al.* (2015) Applying the ARRIVE Guidelines to an In Vivo Database. *PLoS Biol*  
904 13(5):e1002151.

- 905 38. Kilkenney C, Browne WJ, Cuthill IC, Emerson M, & Altman DG (2010) Improving bioscience  
906 research reporting: the ARRIVE guidelines for reporting animal research. *PLoS Biol*  
907 8(6):e1000412.
- 908 39. Asimakopoulou A, *et al.* (2013) Selectivity of commonly used pharmacological inhibitors for  
909 cystathionine beta synthase (CBS) and cystathionine gamma lyase (CSE). *Br J Pharmacol*  
910 169(4):922-932.
- 911 40. Thorson MK, *et al.* (2015) Marine natural products as inhibitors of cystathionine beta-synthase  
912 activity. *Bioorg Med Chem Lett* 25(5):1064-1066.
- 913 41. Thorson MK, Majtan T, Kraus JP, & Barrios AM (2013) Identification of cystathionine  $\beta$ -synthase  
914 inhibitors using a hydrogen sulfide selective probe. *Angew Chem Int Ed Engl* 52(17):4641-4644.
- 915 42. Zhou Y, *et al.* (2013) High-throughput tandem-microwell assay identifies inhibitors of the  
916 hydrogen sulfide signaling pathway. *Chem Commun (Camb)* 49(100):11782-11784.
- 917 43. Chao C, *et al.* (2016) Cystathionine-beta-synthase inhibition for colon cancer: Enhancement of  
918 the efficacy of aminooxyacetic acid via the prodrug approach. *Mol Med* 22.
- 919 44. Druzhyina N, *et al.* (2016) Screening of a composite library of clinically used drugs and well-  
920 characterized pharmacological compounds for cystathionine  $\beta$ -synthase inhibition identifies  
921 benserazide as a drug potentially suitable for repurposing for the experimental therapy of  
922 colon cancer. *Pharmacol Res* 113(Pt A):18-37.
- 923 45. Lasserre JP, *et al.* (2015) Yeast as a system for modeling mitochondrial disease mechanisms  
924 and discovering therapies. *Dis Model Mech* 8(6):509-526.
- 925 46. Voisset C, *et al.* (2014) A yeast-based assay identifies drugs that interfere with Epstein-Barr  
926 virus immune evasion. *Dis Model Mech*.
- 927 47. Couplan E, *et al.* (2011) A yeast-based assay identifies drugs active against human  
928 mitochondrial disorders. *Proc Natl Acad Sci U S A* 108(29):11989-11994.
- 929 48. Khurana V, Tardiff DF, Chung CY, & Lindquist S (2015) Toward stem cell-based phenotypic  
930 screens for neurodegenerative diseases. *Nat Rev Neurol* 11(6):339-350.
- 931 49. Bach S, *et al.* (2003) Isolation of drugs active against mammalian prions using a yeast-based  
932 screening assay. *Nat Biotechnol* 21(9):1075-1081.
- 933 50. Khurana V & Lindquist S (2010) OPINION Modelling neurodegeneration in *Saccharomyces*  
934 *cerevisiae*: why cook with baker's yeast? *Nature Reviews Neuroscience* 11(6):436-449.
- 935 51. Lista MJ, *et al.* (2017) Nucleolin directly mediates Epstein-Barr virus immune evasion through  
936 binding to G-quadruplexes of EBNA1 mRNA. *Nature Communications* 8.
- 937 52. Mayfield JA, *et al.* (2012) Surrogate genetics and metabolic profiling for characterization of  
938 human disease alleles. *Genetics* 190(4):1309-1323.

- 939 53. Kruger WD & Cox DR (1994) A yeast system for expression of human cystathionine beta-  
940 synthase: structural and functional conservation of the human and yeast genes. *Proc Natl Acad*  
941 *Sci U S A* 91(14):6614-6618.
- 942 54. Aiyar RS, *et al.* (2014) Mitochondrial protein sorting as a therapeutic target for ATP synthase  
943 disorders. *Nat Commun* 5:5585.
- 944 55. Duchon A & Herault Y (2016) DYRK1A, a Dosage-Sensitive Gene Involved in  
945 Neurodevelopmental Disorders, Is a Target for Drug Development in Down Syndrome. *Front*  
946 *Behav Neurosci* 10:104.
- 947 56. Hamelet J, *et al.* (2009) Effect of hyperhomocysteinemia on the protein kinase DYRK1A in liver  
948 of mice. *Biochem Biophys Res Commun* 378(3):673-677.
- 949 57. Planque C, *et al.* (2013) Mice deficient in cystathionine beta synthase display increased Dyrk1A  
950 and SAHH activities in brain. *J Mol Neurosci* 50(1):1-6.
- 951 58. Noll C, *et al.* (2009) DYRK1A, a novel determinant of the methionine-homocysteine cycle in  
952 different mouse models overexpressing this Down-syndrome-associated kinase. *PLoS One*  
953 4(10):e7540.
- 954 59. Kwiatkowski TJ, Jr., *et al.* (2009) Mutations in the FUS/TLS Gene on Chromosome 16 Cause  
955 Familial Amyotrophic Lateral Sclerosis. *Science* 323(5918):1205-1208.
- 956 60. Vance C, *et al.* (2009) Mutations in FUS, an RNA Processing Protein, Cause Familial  
957 Amyotrophic Lateral Sclerosis Type 6. *Science* 323(5918):1208-1211.
- 958 61. Polymeropoulos MH, *et al.* (1997) Mutation in the alpha-synuclein gene identified in families  
959 with Parkinson's disease. *Science* 276(5321):2045-2047.
- 960 62. Spillantini MG, *et al.* (1997) alpha-synuclein in Lewy bodies. *Nature* 388(6645):839-840.
- 961 63. Sorensen JB, *et al.* (2003) Differential control of the releasable vesicle pools by SNAP-25 splice  
962 variants and SNAP-23. *Cell* 114(1):75-86.
- 963 64. McMahon HT & Sudhof TC (1995) SYNAPTIC CORE COMPLEX OF SYNAPTOBREVIN, SYNTAXIN,  
964 AND SNAP25 FORMS HIGH-AFFINITY ALPHA-SNAP FINDING SITE. *Journal of Biological*  
965 *Chemistry* 270(5):2213-2217.
- 966 65. Zhou Q, *et al.* (2017) The primed SNARE-complexin-synaptotagmin complex for neuronal  
967 exocytosis. *Nature* 548(7668):420-425.
- 968 66. Régnier V, *et al.* (2012) Brain phenotype of transgenic mice overexpressing cystathionine  $\beta$ -  
969 synthase. *PLoS One* 7(1):e29056.
- 970 67. Kimura H (2002) Hydrogen sulfide as a neuromodulator. *Mol Neurobiol* 26(1):13-19.
- 971 68. Kimura H (2000) Hydrogen sulfide induces cyclic AMP and modulates the NMDA receptor.  
972 *Biochem Biophys Res Commun* 267(1):129-133.

- 973 69. Hu LF, Lu M, Hon Wong PT, & Bian JS (2011) Hydrogen sulfide: neurophysiology and  
974 neuropathology. *Antioxid Redox Signal* 15(2):405-419.
- 975 70. Johansson B (1992) A review of the pharmacokinetics and pharmacodynamics of disulfiram  
976 and its metabolites. *Acta Psychiatr Scand Suppl* 369:15-26.
- 977 71. Barth KS & Malcolm RJ (2010) Disulfiram: an old therapeutic with new applications. *CNS Neurol*  
978 *Disord Drug Targets* 9(1):5-12.
- 979 72. Delabar JM, *et al.* (2014) One-carbon cycle alterations induced by Dyrk1a dosage. *Mol Genet*  
980 *Metab Rep* 1:487-492.
- 981 73. Antunes M & Biala G (2012) The novel object recognition memory: neurobiology, test  
982 procedure, and its modifications. *Cognitive Processing* 13(2):93-110.
- 983 74. Clark RE, Zola SM, & Squire LR (2000) Impaired recognition memory in rats after damage to  
984 the hippocampus. *Journal of Neuroscience* 20(23):8853-8860.
- 985 75. Clarke JR, Cammarota M, Gruart A, Izquierdo I, & Delgado-Garcia JM (2010) Plastic  
986 modifications induced by object recognition memory processing. *Proceedings of the National*  
987 *Academy of Sciences of the United States of America* 107(6):2652-2657.
- 988 76. Reger ML, Hovda DA, & Giza CC (2009) Ontogeny of Rat Recognition Memory Measured by the  
989 Novel Object Recognition Task. *Developmental Psychobiology* 51(8):672-678.
- 990 77. Stackman RW, Cohen SJ, Lora JC, & Rios LM (2016) Temporary inactivation reveals that the  
991 CA1 region of the mouse dorsal hippocampus plays an equivalent role in the retrieval of long-  
992 term object memory and spatial memory. *Neurobiology of Learning and Memory* 133:118-128.
- 993 78. Warburton EC & Brown MW (2015) Neural circuitry for rat recognition memory. *Behavioural*  
994 *Brain Research* 285:131-139.
- 995 79. Benchenane K, *et al.* (2010) Coherent theta oscillations and reorganization of spike timing in  
996 the hippocampal- prefrontal network upon learning. *Neuron* 66(6):921-936.
- 997 80. Wei J, Bai WW, Liu TT, & Tian X (2015) Functional connectivity changes during a working  
998 memory task in rat via NMF analysis. *Frontiers in Behavioral Neuroscience* 9.
- 999 81. Lin JD, *et al.* (2004) Defects in adaptive energy metabolism with CNS-Linked hyperactivity in  
1000 PGC-1 alpha null mice. *Cell* 119(1):121-+.
- 1001 82. Vallone D, Picetti R, & Borrelli E (2000) Structure and function of dopamine receptors.  
1002 *Neuroscience and Biobehavioral Reviews* 24(1):125-132.
- 1003 83. Bymaster FP, *et al.* (2002) Atomoxetine increases extracellular levels of norepinephrine and  
1004 dopamine in prefrontal cortex of rat: A potential mechanism for efficacy in Attention  
1005 Deficit/Hyperactivity Disorder. *Neuropsychopharmacology* 27(5):699-711.



- 1006 84. Cador M, Robbins TW, & Everitt BJ (1989) INVOLVEMENT OF THE AMYGDALA IN STIMULUS  
1007 REWARD ASSOCIATIONS - INTERACTION WITH THE VENTRAL STRIATUM. *Neuroscience*  
1008 30(1):77-86.
- 1009 85. Anderson MJ, *et al.* (2004) Effects of ontogeny on performance of rats in a novel object-  
1010 recognition task. *Psychological Reports* 94(2):437-443.
- 1011 86. Rudy JW & Morledge P (1994) ONTOGENY OF CONTEXTUAL FEAR CONDITIONING IN RATS -  
1012 IMPLICATIONS FOR CONSOLIDATION, INFANTILE AMNESIA, AND HIPPOCAMPAL SYSTEM  
1013 FUNCTION. *Behavioral Neuroscience* 108(2):227-234.
- 1014 87. Belichenko PV, *et al.* (2015) Down Syndrome Cognitive Phenotypes Modeled in Mice Trisomic  
1015 for All HSA 21 Homologues. *Plos One* 10(7).
- 1016 88. Park J, Sung JY, Song WJ, Chang S, & Chung KC (2012) Dyrk1A negatively regulates the actin  
1017 cytoskeleton through threonine phosphorylation of N-WASP. *J Cell Sci* 125(Pt 1):67-80.
- 1018 89. Zhang LJ, Tao BB, Wang MJ, Jin HM, & Zhu YC (2012) PI3K p110 $\alpha$  isoform-dependent Rho  
1019 GTPase Rac1 activation mediates H2S-promoted endothelial cell migration via actin  
1020 cytoskeleton reorganization. *PLoS One* 7(9):e44590.
- 1021 90. Hong JY, *et al.* (2012) Down's-syndrome-related kinase Dyrk1A modulates the p120-catenin-  
1022 Kaiso trajectory of the Wnt signaling pathway. *J Cell Sci* 125(Pt 3):561-569.
- 1023 91. Herault Y, *et al.* (2017) Rodent models in Down syndrome research: impact and future  
1024 opportunities. *Dis Model Mech* 10(10):1165-1186.
- 1025 92. de la Torre R, *et al.* (2016) Safety and efficacy of cognitive training plus epigallocatechin-3-  
1026 gallate in young adults with Down's syndrome (TESDAD): a double-blind, randomised, placebo-  
1027 controlled, phase 2 trial. *Lancet Neurology* 15(8):801-810.
- 1028 93. De la Torre R, *et al.* (2014) Epigallocatechin-3-gallate, a DYRK1A inhibitor, rescues cognitive  
1029 deficits in Down syndrome mouse models and in humans. *Molecular Nutrition & Food Research*  
1030 58(2):278-288.
- 1031
